# Supplementary material
Source: PubMed Central journal article supplement (PMC2878383)

# Supporting Information

For

## Approaches to *N*-Methylwelwitindolinone C Isothiocyanate: Facile Synthesis of the Tetracyclic Core

**Richard W. Heidebrecht, Jr., Brian Gullledge, and Stephen F. Martin\***

*Department of Chemistry and Biochemistry, The University of Texas at Austin,*

*Austin TX, 78712*

[sfmartin@mail.utexas.edu](mailto:sfmartin@mail.utexas.edu)

## Experimental Section

**General** Melting points were determined using a Thomas-Hoover Uni-melt capillary melting point apparatus and are uncorrected. Infrared (IR) spectra were recorded on a Perkin-Elmer 1600 series FTIR spectrometer and are reported in wavenumbers ( $\text{cm}^{-1}$ ). Oils were analyzed as neat films on sodium chloride plates, and solids were analyzed as solutions in the solvent indicated. Proton nuclear magnetic resonance ( $^1\text{H}$  NMR) spectra were measured on Varian 500 series (500 MHz) or a Varian Mercury-400 (400 MHz) spectrometer. Carbon magnetic resonance ( $^{13}\text{C}$  NMR) spectra were measured using the above instruments operating at 126 or 101 MHz, respectively.  $^1\text{H}$  NMR and  $^{13}\text{C}$  NMR spectra were recorded for samples in  $\text{CDCl}_3$  and are reported in parts per million (ppm) downfield ( $\delta$ ) using residual chloroform ( $\text{CHCl}_3$ ) as an internal standard set to  $\delta$  7.26 and  $\delta$  77.0 respectively. Proton NMR data are reported in the form:  $\delta$  (multiplicity [s, singlet; d, doublet; t, triplet; q, quartet; p, pentet; m, multiplet; comp, complex multiplet; br, broad; app, apparent], coupling constants, number of protons). Low resolution chemical ionization mass spectral data (CI) were recorded on a Finnigan TSQ-70 mass spectrometer, and high resolution chemical ionization mass spectra (HRMS) were obtained on a VG ZAB2-E instrument. Analytical thin layer chromatography (TLC) was performed on glass-backed silica gel plates precoated (0.25 mm thick) with 60 F<sub>254</sub>. Compounds were visualized under UV light and/or staining with ethanolic *p*-anisaldehyde or basic aqueous potassium permanganate. Liquid chromatography was performed using forced flow (flash chromatography) of the indicated solvent system on 230-400 mesh silica gel (E. Merck reagent silica gel 60).

All reagents were reagent grade and used as received unless noted otherwise. Diethyl ether ( $\text{Et}_2\text{O}$ ), tetrahydrofuran (THF) and dimethylformamide (DMF) were dried by filtration through alumina according to the procedure described by Grubbs (Pangborn, A. B.; Giardello, M. A.; Grubbs, R. H.; Rosen, R. K.; Timmers, F. J. *Organometallics* **1996**, *15*, 1518-1520.) Toluene was additionally deoxygenated by passing through activated Q5. Triethylamine ( $\text{Et}_3\text{N}$ ), diisopropylamine ( $i\text{Pr}_2\text{NH}$ ), methylene chloride ( $\text{CH}_2\text{Cl}_2$ ), allyl bromide, and 1,8-diazabicyclo[5.4.0]undec-7-ene (DBU) were distilled from  $\text{CaH}_2$  under nitrogen immediately before use. Xylenes was distilled from  $\text{CaH}_2$  under nitrogen and stored over 4Å molecular sieves. Methanol (MeOH) was degassed with a stream of argon, then distilled from  $\text{CaH}_2$  and stored under nitrogen.

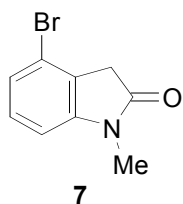

**4-Bromo-1-methyl-1,3-dihydro-2-oxindole (7).** A suspension of sodium hydride (331 mg, 8.63 mmol, 60% in oil) and xylenes (17.3 mL) was heated to 130 °C. After 15 min, 4-bromo-1,3-dihydro-2-oxindole (**8**, 1.83 g, 8.63 mmol) was added in ~10 equal portions over 5 min. The resulting light orange suspension was heated under reflux for 1 h. Dimethylsulfate (0.818 mL, 8.63 mmol) was added slowly dropwise. The suspension effervesced during addition, then quickly became clear and orange. After 1 h, the reaction was cooled and diluted with EtOAc (30 mL). The organic layer was washed with water (3 x 15 mL), brine (15 mL), dried (MgSO<sub>4</sub>) and concentrated to provide a yellow solid. The product was purified by flash column chromatography eluting with a solvent gradient (CH<sub>2</sub>Cl<sub>2</sub> to 10% Et<sub>2</sub>O in CH<sub>2</sub>Cl<sub>2</sub>) to give 1.29 g (66%) of **7** as a fluffy light yellow solid: mp 138-139 °C; R<sub>f</sub> 0.49 (50% EtOAc in hexanes), 0.49 (5% Et<sub>2</sub>O in CH<sub>2</sub>Cl<sub>2</sub>); <sup>1</sup>H NMR (500 MHz, CDCl<sub>3</sub>) δ 7.15 - 7.10 (comp, 2 H), 6.73 - 6.69 (m, 1 H), 3.43 (s, 2 H), 3.17 (s, 3 H); <sup>13</sup>C NMR (126 MHz, CDCl<sub>3</sub>) δ 173.7, 146.0, 129.4, 125.4, 125.3, 119.0, 106.8, 37.0, 26.5; IR (CHCl<sub>3</sub>) 3054, 2939, 1717, 1611, 1458, 1340, 1296, 1106, 925, 770, 708 cm<sup>-1</sup>; mass spectrum (CI) *m/z* 225.9875 [C<sub>9</sub>H<sub>9</sub>NOBr (M+H)<sup>+</sup> requires 225.9868] (base), 175, 147.

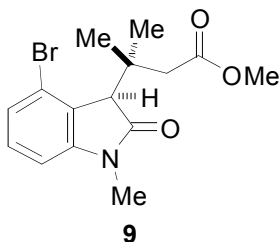

**Methyl-3-(4-bromo-1-methyl-2,3-dihydro-2-oxindol-3-yl)-3-methylbutyrate (9).** A suspension of **7** (264 mg, 1.17 mmol), MeOH (0.779 mL) and methyl 3,3-dimethylacrylate (0.765 mL, 5.85 mmol) was treated with sodium methoxide (63.2 mg, 1.17 mmol). A significant portion of the solids dissolved, and the suspension was heated to 55 °C. This yellow reaction turned green after 1 h, then blue after 2 h. After 40 h of heating, the reaction was cooled, and 1 M aqueous HCl (~ 2 mL) and water (15 mL) were added. The mixture was stirred for 5 min and extracted with EtOAc (3 x 20 mL). The combined organic layers were dried (MgSO<sub>4</sub>) and concentrated to provide an orange oil. The

residue was purified by flash column chromatography eluting with 10% EtOAc in benzene (mixed fractions rechromatographed twice) to give 236 mg (62%) of **9** as a light yellow solid: mp 75-77 °C;  $R_f$  0.63 (50% EtOAc in hexanes), 0.38 (10% EtOAc in benzene);  $^1\text{H NMR}$  (400 MHz,  $\text{CDCl}_3$ )  $\delta$  7.13 (dd,  $J = 7.9, 1.0$  Hz, 1 H), 7.08 (td,  $J = 7.9, 1.0$  Hz, 1 H), 6.68 (dd,  $J = 7.9, 1.0$  Hz, 1 H), 3.82 (s, 1 H), 3.66 (s, 3 H), 3.09 (s, 3 H), 2.92 (A of AB,  $J_{AB} = 15.1$  Hz, 1 H), 2.49 (B of AB,  $J_{AB} = 15.1$  Hz, 1 H), 1.31 (s, 3 H), 0.87 (s, 3 H);  $^{13}\text{C NMR}$  (101 MHz,  $\text{CDCl}_3$ )  $\delta$  176.4, 172.4, 147.2, 129.4, 127.9, 126.6, 120.9, 106.4, 54.0, 51.2, 43.3, 39.6, 27.6, 25.9, 24.2; IR (neat) 2950, 2882, 1713 (br), 1603, 1454, 1330, 1172, 1100, 932, 767  $\text{cm}^{-1}$ ; mass spectrum (CI)  $m/z$  340.0554 [ $\text{C}_{15}\text{H}_{19}\text{NO}_3\text{Br}$  ( $\text{M}+\text{H}$ ) $^+$  requires 340.0548], 310, 308, 268, 266, 256, 254, 228, 226 (base).

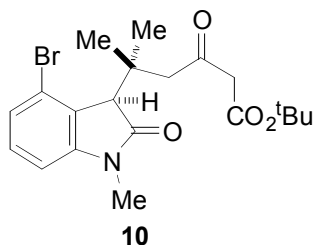

***tert*-Butyl 5-(4-bromo-1-methyl-2,3-dihydro-2-oxindol-3-yl)-5-methyl-3-oxohexanoate (**10**).**

A solution of  $i\text{Pr}_2\text{NH}$  (97.5  $\mu\text{L}$ , 0.696 mmol) and THF (4.46 mL) was cooled to  $-78$  °C and treated with  $n\text{BuLi}$  (0.278 mL, 2.50 M in hexanes, 0.696 mmol). After 1 min, the reaction was warmed to  $0$  °C and stirred 30 min. The clear, colorless solution was cooled to  $-50$  °C and treated with a solution of  $t\text{BuOAc}$  (93.8  $\mu\text{L}$ , 0.696 mmol) and THF (0.446 mL) dropwise. The reaction was stirred for 1 h between  $-45$  °C to  $-30$  °C, and a solution of **9** (39.3 mg, 0.116 mmol) was added dropwise. The reaction was stirred for 1 h between  $-45$  °C to  $-30$  °C and then slowly warmed to room temperature over the next 1 h. Saturated aqueous  $\text{NH}_4\text{Cl}$  (5 mL) and water (20 mL) were added, and the mixture was extracted with  $\text{Et}_2\text{O}$  (3 x 20 mL). The combined organic layers were dried ( $\text{MgSO}_4$ ) and concentrated to provide a yellow oil. The residue was purified by flash column chromatography eluting with a solvent gradient (10%  $\text{Et}_2\text{O}$  in hexanes to 40%  $\text{Et}_2\text{O}$  in hexanes) to give 35.3 mg (72%) of **10** as a light yellow oil:  $R_f$  0.54 (40% EtOAc in hexanes);  $^1\text{H NMR}$  (300 MHz,  $\text{CDCl}_3$ )  $\delta$  7.20 - 7.08 (comp, 2 H), 6.71 (d,  $J = 7.3$  Hz, 1 H), 3.94 (s, 1 H), 3.44 (A of AB,  $J_{AB} = 15.3$  Hz, 1 H), 3.39 (B of AB,  $J_{AB} = 15.3$  Hz, 1 H), 3.17 (A of AB,  $J_{AB} = 17.8$  Hz, 1 H), 3.11 (s, 3 H), 2.70 (B of AB,  $J_{AB} = 17.8$  Hz, 1 H), 1.47 (s, 9 H), 1.40 (s, 3 H), 0.79 (s, 3 H);  $^{13}\text{C NMR}$  (75 MHz,  $\text{CDCl}_3$ )  $\delta$  202.2, 176.6, 166.5, 147.1, 129.4, 128.1, 126.7, 120.7, 106.4,

81.7, 53.1, 52.0, 51.3, 39.5, 28.4, 28.0, 25.9, 23.9; IR (neat) 2973, 1713 (br), 1603, 1455, 1368, 1327, 1251, 1158, 1101, 932, 768  $\text{cm}^{-1}$ ; mass spectrum (CI)  $m/z$  424.1109 [ $\text{C}_{20}\text{H}_{27}\text{NO}_4\text{Br}$  ( $\text{M}+\text{H}$ )<sup>+</sup> requires 424.1124] (base), 370, 368, 352, 350, 171.

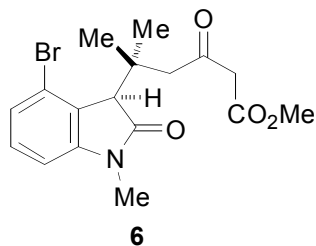

**Methyl 5-(4-bromo-1-methyl-2,3-dihydro-2-oxindol-3-yl)-5-methyl-3-oxohexanoate (6).** Neat **10** (142 mg, 0.335 mmol) was cooled to 0 °C, and trifluoroacetic acid (0.669 mL) was added. After 1 h, the reaction was concentrated via rotovap (rt water bath), and the residue was dissolved in  $\text{Et}_2\text{O}$  (0.669 mL). The solution was cooled to 0 °C, and an ethereal solution of diazomethane (~0.3M) was added utilizing a flame polished pipette until the yellow color persisted. The reaction was quenched with 1 M aqueous HCl (5 mL), stirred 5 min, then extracted into  $\text{Et}_2\text{O}$  (3 x 5 mL). The combined organic layers were dried ( $\text{MgSO}_4$ ) and concentrated to provide a clear light yellow oil. The residue was purified by flash column chromatography eluting with a solvent gradient (20% EtOAc in hexanes to 40% EtOAc in hexanes) to give 121 mg (95%) of **6** as a clear light yellow oil:  $R_f$  0.24 (30% EtOAc in hexanes);  $^1\text{H}$  NMR (300 MHz,  $\text{CDCl}_3$ )  $\delta$  7.20 - 7.08 (comp, 2 H), 6.71 (dd,  $J = 7.3, 1.0$  Hz, 1 H), 3.95 (s, 1 H), 3.75 (s, 3 H), 3.55 (s, 2 H), 3.23 (A of AB,  $J_{\text{AB}} = 17.9$  Hz, 1 H), 3.10 (s, 3 H), 2.63 (B of AB,  $J_{\text{AB}} = 17.9$  Hz, 1 H), 1.43 (s, 3 H), 0.74 (s, 3 H);  $^{13}\text{C}$  NMR (75 MHz,  $\text{CDCl}_3$ )  $\delta$  201.8, 176.6, 167.7, 147.1, 129.4, 128.1, 126.7, 120.7, 106.5, 52.8, 52.3, 51.4, 50.5, 39.5, 28.8, 26.9, 23.9; IR (neat) 2963, 2881, 1747, 1714 (br), 1603, 1454, 1329, 1102, 932, 768  $\text{cm}^{-1}$ ; mass spectrum (CI)  $m/z$  384, 382.0654 [ $\text{C}_{17}\text{H}_{21}\text{NO}_4\text{Br}$  ( $\text{M}+\text{H}$ )<sup>+</sup> requires 382.0654] (base), 352, 350, 304.

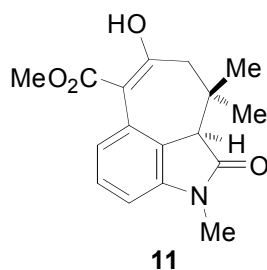

**Catalysis with [(<sup>t</sup>Bu<sub>3</sub>P)<sub>2</sub>Pd].** Aryl bromide **6** (28.5 mg, 74.6 μmol), *bis*-(tri-*tert*-butylphosphine)palladium (0) (7.6 mg, 14.9 μmol), *bis*-dibenzylidene-palladium (0) (4.3 mg, 7.46 μmol) and sodium *tert*-butoxide (7.9 mg, 82.1 μmol) were added to a dry Kjeldahl-shaped Schlenk flask. The flask was evacuated and backfilled with argon three times, and DMF (0.522 mL) was added. The brown suspension was deoxygenated via a freeze-pump-thaw protocol (3 cycles, 20 min each), and then heated to 75 °C (oil bath temperature). After 3 h, the reaction was cooled, 1 M aqueous HCl (5 mL) was added, and the mixture was extracted with EtOAc (3 x 5 mL). The combined organic layers were dried (MgSO<sub>4</sub>) and concentrated. The residue was purified by flash column chromatography eluting with a solvent gradient (10% EtOAc in hexanes to 30% EtOAc in hexanes) to give 19.9 mg (88%) of **11** as a white solid.

**Catalysis with [<sup>t</sup>Bu<sub>2</sub>P(2-biphenyl)].** Aryl bromide **6** (24.2 mg, 63.3 μmol), 2-(di-*tert*-butylphosphino)biphenyl (**27**, 8.3 mg, 27.9 μmol) and sodium *tert*-butoxide (6.7 mg, 69.6 μmol) were added to a dry Kjeldahl-shaped Schlenk flask. The flask was evacuated and backfilled with argon three times and DMF (0.443 mL) was added. The orange suspension was deoxygenated via a freeze-pump-thaw protocol (3 cycles, 20 min each), then heated to 75 °C (oil bath temperature) for 4.5 h. The black reaction was quenched with 1 M aqueous HCl (5 mL) and extracted with EtOAc (3 x 5 mL). The combined organic layers were dried (MgSO<sub>4</sub>) and concentrated. The residue was purified by flash column chromatography eluting with a solvent gradient (10% EtOAc in hexanes to 30% EtOAc in hexanes) to give 11.0 mg (58%) of **11** as a white solid.

**Methyl 7-Hydroxy-2,9,9-trimethyl-1-oxo-2,8,9,9a-tetrahydro-2-azabenzocdazulene-6-carboxylate (11).** mp 114-117 °C; R<sub>f</sub> 0.56 (40% EtOAc in hexanes); <sup>1</sup>H NMR (500 MHz, CDCl<sub>3</sub>) δ 13.1 (d, *J* = 1.0 Hz, 1 H), 7.25 (td, *J* = 7.8, 0.7 Hz, 1 H), 7.11 (dd, *J* = 7.8, 0.7 Hz, 1 H), 6.66 (d, *J* = 7.8 Hz, 1 H), 3.79 (s, 3 H), 3.16 (s, 3 H), 2.98 (s, 1 H), 2.20 (d, *J* = 12.6 Hz, 1 H), 2.06 (d, *J* = 12.6 Hz, 1 H), 1.51 (s, 3 H), 0.88 (s, 3 H); <sup>13</sup>C NMR (126 MHz, CDCl<sub>3</sub>) δ 177.5, 176.1, 171.7, 143.6, 131.3, 127.5, 126.8, 123.4, 105.5, 101.3, 52.5, 51.8, 48.3, 48.2, 28.6, 26.0, 24.8; IR (neat) 3016, 2928, 2855, 1703,

1644, 1604, 1444, 1370, 1334, 1296, 1236, 770  $\text{cm}^{-1}$ ; mass spectrum (CI)  $m/z$  302.1382 [ $\text{C}_{17}\text{H}_{20}\text{NO}_4$  ( $\text{M}+\text{H})^+$  requires 302.1392] (base), 286, 270.

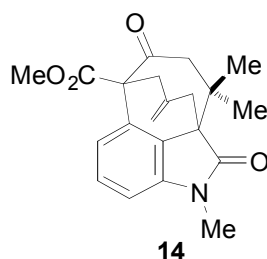

**Oxindole-bridged[2.3.3]bicyclic 14.** To a solution of **11** (14.2 mg, 47.1  $\mu\text{mol}$ ) and THF (0.236 mL) was added DBU (8.0  $\mu\text{L}$ , 51.8  $\mu\text{mol}$ ). To this orange solution was added carbonate **12** (9.0  $\mu\text{L}$ , 51.8  $\mu\text{mol}$ ) and this mixture was added to a solution of tetrakis(triphenylphosphine) palladium (5.4 mg, 47.1  $\mu\text{mol}$ ) and THF (0.236 mL) over 10 min. After 2 h, the reaction was concentrated under reduced vacuum, and the residue was purified by flash chromatography eluting with a solvent gradient (10% EtOAc in hexanes to 20% EtOAc in hexanes) to afford 9.8 mg (59%) of **14** as a white solid:  $R_f$  0.29 (30% EtOAc in hexanes);  $^1\text{H}$  NMR (500 MHz)  $\delta$  7.29 (t,  $J = 7.8$  Hz, 1 H), 6.82 (dd,  $J = 7.8, 0.8$  Hz, 1 H), 6.56 (dd,  $J = 7.8, 0.8$  Hz, 1 H), 4.91 (br s, 1 H), 4.86 (br s, 1 H), 3.83 (s, 3 H), 3.31 (d,  $J = 13.8$  Hz, 1 H), 3.22 (s, 3 H), 2.92 (d,  $J = 14.9$  Hz, 1 H), 2.65 (d,  $J = 12.1$  Hz, 1 H), 2.53 (d,  $J = 13.8$  Hz, 1 H), 2.15 (d,  $J = 12.1$  Hz, 1 H), 2.13 (d,  $J = 14.9$  Hz, 1 H), 1.44 (s, 3 H), 0.78 (s, 3 H);  $^{13}\text{C}$  (126 MHz)  $\delta$  208.0, 178.6, 171.1, 143.2, 141.7, 137.3, 129.2, 129.0, 119.9, 118.8, 107.3, 67.2, 56.9, 54.4, 52.6, 45.1, 41.6, 38.7, 28.3, 26.1, 22.9; IR (neat) 3018, 2955, 1746, 1707, 1607, 1470, 1246  $\text{cm}^{-1}$ ; MS (CI)  $m/z$  354.1701 [ $\text{C}_{21}\text{H}_{24}\text{NO}_4$  ( $\text{M}+\text{H})^+$  requires 354.1705] (base), 322.

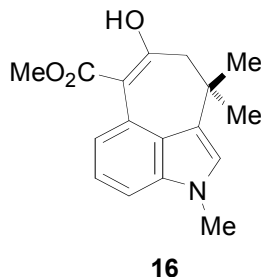

**Methyl 7-hydroxyl-2,9,9-trimethyl-8,9-dihydro-2H-2-aza-benzo(cd)azulene-6-carboxylate (16).** A solution of **11** (45.8 mg, 0.152 mmol) and  $\text{CH}_2\text{Cl}_2$  (1.52 mL) was cooled to  $-78$   $^\circ\text{C}$  and Dibal

(0.258 mL, 0.258 mmol, 1 M in CH<sub>2</sub>Cl<sub>2</sub>) was added slowly dropwise. After 2 h, 1 M aqueous HCl (5 mL) and CH<sub>2</sub>Cl<sub>2</sub> (5 mL) was added and the mixture was stirred vigorously for 1 h. The layers were separated and the aqueous layer was extracted with CH<sub>2</sub>Cl<sub>2</sub> (2 x 5 mL). The combined organic layers were dried (MgSO<sub>4</sub>) and concentrated to afford a residue that was purified by flash chromatography eluting with a solvent gradient (5% EtOAc in hexanes to 20% EtOAc in hexanes) to afford 12.2 mg of starting material **11** (27% recovery) and 19.7 mg (45%) of **16** as a white solid: mp 143-145 °C (from Et<sub>2</sub>O/CH<sub>2</sub>Cl<sub>2</sub>); R<sub>f</sub> 0.36 (20% Et<sub>2</sub>O in hexanes); <sup>1</sup>H NMR (500 MHz, CDCl<sub>3</sub>) δ 13.6 (s, 1 H), 7.26 (dd, *J* = 7.8, 1.2 Hz, 1 H), 7.21 (t, *J* = 7.8 Hz, 1 H), 7.15 (dd, *J* = 7.8, 1.2 Hz, 1 H), 6.86 (s, 1 H), 3.84 (s, 3 H), 3.74 (s, 3 H), 2.88 (br d, *J* = 13.1 Hz, 1 H), 2.45 (br d, *J* = 13.1 Hz, 1 H), 1.46 (br s, 3 H), 1.34 (br s, 3 H); <sup>13</sup>C NMR (126 MHz, CDCl<sub>3</sub>) δ 176.3, 173.9, 137.0, 125.4, 125.3, 124.2, 123.3, 121.5, 120.8, 106.9, 102.2, 51.9, 50.2, 34.1, 32.7, 31.5, 29.1; IR (neat) 3008, 2964, 1634, 1594, 1440, 1372, 1332, 1300, 1236, 1074, 1032 cm<sup>-1</sup>; mass spectrum (CI) *m/z* 286.1445 [C<sub>17</sub>H<sub>20</sub>NO<sub>3</sub> (M+H)<sup>+</sup> requires 286.1443] (base), 254.

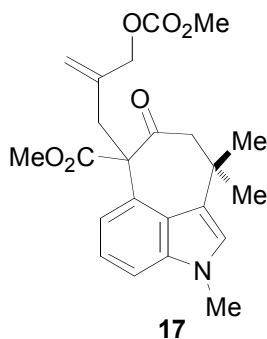

**Methyl 6-[2-(methoxycarbonyloxymethyl)prop-2-enyl]-2,9,9-trimethyl-7-oxo-6,7,8,9-tetrahydro-2H-2-azabenz[cd]azulene-6-carboxylate (17).** A solution of **16** (7.8 mg, 27 μmol), THF (0.27 mL), carbonate **12** (5.0 μL, 30 μmol), and (Ph<sub>3</sub>P)<sub>4</sub>Pd (0) (3.1 mg, 2.7 μmol) was stirred for 15 min. EtOAc (5 mL) was added, and the mixture was washed with H<sub>2</sub>O (2x5 mL), brine (5 mL), dried (MgSO<sub>4</sub>) and concentrated to afford a residue that was purified by flash chromatography eluting with a solvent gradient (20% EtOAc in hexanes to 30% EtOAc in hexanes) to afford 8.7 mg (79%) of **17** as a clear colorless residue: R<sub>f</sub> 0.15 (20% EtOAc in hexanes); <sup>1</sup>H NMR (500 MHz, CDCl<sub>3</sub>) δ 7.26 (dd, *J* = 8.1, 1.1 Hz, 1 H), 7.21 (t, *J* = 7.8 Hz, 1 H), 7.04 (dd, *J* = 7.2, 1.1 Hz, 1 H), 6.98 (s, 1 H), 5.04 (d, *J* = 1.3 Hz, 1 H), 4.87 (s, 1 H), 4.07 (d, *J* = 13.7 Hz, 1 H), 4.00 (d, *J* = 13.7 Hz, 1 H), 3.77 (s, 3 H), 3.72 (s, 1 H), 3.59 (s, 3 H), 3.35 (d, *J* = 14.4 Hz, 1 H), 3.16 (d, *J* = 14.4 Hz, 1 H), 3.08 (d, *J* = 10.9 Hz, 1 H), 2.83 (d, *J*



= 10.9 Hz, 1 H), 1.42 (s, 3 H), 1.36 (s, 3 H);  $^{13}\text{C}$  NMR (126 MHz,  $\text{CDCl}_3$ )  $\delta$  207.6, 172.3, 155.2, 139.3, 137.5, 129.1, 125.3, 124.1, 123.8, 121.7, 118.6, 118.1, 108.9, 70.2, 69.8, 58.2, 54.6, 52.8, 43.4, 33.0, 32.9, 32.0, 31.8; IR (neat) 2958, 1745, 1697, 1444, 1266, 1239, 981, 750  $\text{cm}^{-1}$ ; mass spectrum (CI)  $m/z$  413.1836 [ $\text{C}_{23}\text{H}_{27}\text{NO}_6$  (M+H) $^+$  requires 413.1838], 338 (base), 320, 278.

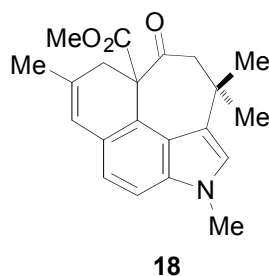

**Methyl 2,6,10,10-Tetramethyl-8-oxo-2,8,9,10-tetrahydro-7H-2-azanaphtho[2,1,8-cde]azulene-7a-carboxylate (18).** A solution of **17** (4.3 mg, 10.4  $\mu\text{mol}$ ) and  $\text{ZnCl}_2$  (31  $\mu\text{L}$ , 31  $\mu\text{mol}$ , 1.0 M in  $\text{Et}_2\text{O}$ ) in  $\text{CH}_2\text{Cl}_2$  (0.21 mL) was heated to 60  $^\circ\text{C}$  in a sealed flask for 2 d. The reaction was diluted with  $\text{EtOAc}$  (2 mL), and the mixture was washed with  $\text{H}_2\text{O}$  (2 x 2 mL), brine (2 mL). The organic layer was dried ( $\text{MgSO}_4$ ) and concentrated, and the residue was purified by flash chromatography eluting with a solvent gradient (10%  $\text{EtOAc}$  in hexanes to 20%  $\text{EtOAc}$  in hexanes) to afford 1.7 mg (51%) of **18** as a clear colorless oil:  $R_f$  0.44 (30%  $\text{EtOAc}$  in hexanes);  $^1\text{H}$  NMR (500 MHz,  $\text{CDCl}_3$ )  $\delta$  7.20 (d,  $J = 8.4$  Hz, 1 H), 7.02 (d,  $J = 8.4$  Hz, 1 H), 6.96 (s, 1 H), 6.33 (dq,  $J = 4.2, 2.1$  Hz, 1 H), 3.74 (s, 3 H), 3.61 (s, 3 H), 3.09 (d,  $J = 10.5$  Hz, 1 H), 2.89 (ddq,  $J = 16.8, 4.2, 2.1$  Hz, 1 H), 2.72 (d,  $J = 16.8$  Hz, 1 H), 2.62 (d,  $J = 10.4$  Hz, 1 H), 1.95 (t,  $J = 2.1$  Hz, 3 H), 1.49 (s, 3 H), 1.28 (s, 3 H);  $^{13}\text{C}$  NMR (126 MHz,  $\text{CDCl}_3$ )  $\delta$  203.4, 172.6, 136.5, 132.7, 127.2, 126.2, 124.2, 123.8, 122.9, 121.2, 120.0, 109.0, 66.3, 54.9, 52.9, 35.3, 33.1, 32.9, 32.6, 32.4, 22.9; IR (neat) 2952, 1727, 1712, 1473, 1434, 1227, 1160  $\text{cm}^{-1}$ ; mass spectrum (CI)  $m/z$  338.1752 [ $\text{C}_{21}\text{H}_{24}\text{NO}_3$  (M+H) $^+$  requires 338.1756] (base), 320, 278.

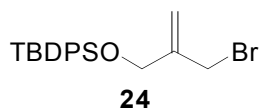

**2-(*tert*-Butyl-diphenylsilyloxy)methyl)prop-2-en-1-yl bromide (24).** Triphenylphosphine (0.5263 g, 2.007 mmol) and carbon tetrabromide (0.6635 g, 2.000 mmol) were added to a stirred solution of the corresponding allylic alcohol (0.6615 g, 2.026 mmol) in CH<sub>2</sub>Cl<sub>2</sub> (8.0 mL) at 0 °C. The reaction mixture was stirred for 40 min and then concentrated *in vacuo*. The crude solid was purified via flash chromatography, eluting with 10% EtOAc in hexanes, to afford 0.8644 g (99%) of **24** as a colorless oil: *R*<sub>f</sub> = 0.51 (10% EtOAc in hexanes); <sup>1</sup>H NMR (500 MHz, CDCl<sub>3</sub>) δ 7.67 (dd, *J* = 8.0, 1.4 Hz, 4 H), 7.44–7.36 (m, 6 H), 5.29 (dd, *J* = 3.0, 1.6 Hz, 1 H), 5.27–5.26 (m, 1 H), 4.29 (t, *J* = 1.3 Hz, 2 H), 4.01 (s, 2 H), 1.06 (s, 9 H); <sup>13</sup>C NMR (125 MHz, CDCl<sub>3</sub>) δ 144.4, 135.5, 133.3, 129.7, 127.7, 114.9, 64.2, 32.7, 26.8, 19.3; IR 3070, 2958, 2930, 2857, 1112 cm<sup>-1</sup>; HRMS (CI, CH<sub>4</sub>) *m/z* calcd for C<sub>20</sub>H<sub>26</sub>OSiBr (M + H)<sup>+</sup> 389.0936, found 389.0921.

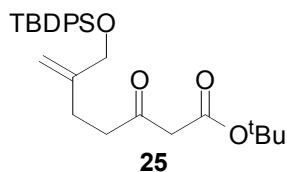

***tert*-Butyl 7-(*tert*-butyldiphenylsilyloxy)-6-methylidene-hept-3-ynoate (25).** *n*BuLi (1.05 mL, 2.11 M in hexanes, 2.22 mmol) was added to a stirred solution of diisopropylamine (0.32 mL, 2.3 mmol) in THF (7.0 mL) at –78 °C. The solution was warmed to 0 °C (replaced the dry ice/isopropanol bath with ice), stirred for 40 min, and then *tert*-butylacetoacetate (**23**) (0.18 mL, 1.1 mmol) was added dropwise over 5 min. After 45 min the solution was cooled to –78 °C and the allylic bromide **24** (0.3591 g, 0.9222 mmol) in THF (3 mL) was added over 10 min. The reaction mixture was stirred for 1.25 h, warmed to rt (by removing the dry ice/isopropanol bath) and stirred for 2.5 h. Next the solution was poured into saturated NH<sub>4</sub>Cl (40 mL) and the resultant aqueous mixture was extracted with EtOAc (3 × 30 mL). The combined organic extracts were washed with brine (40 mL), dried (MgSO<sub>4</sub>), and concentrated *in vacuo*. The residue was purified by flash chromatography, eluting with 10% EtOAc in hexanes, afforded 0.3013 g (70%) of the product **25** as a colorless oil: *R*<sub>f</sub> = 0.60 (40% EtOAc in hexanes); <sup>1</sup>H NMR (400 MHz, CDCl<sub>3</sub>) δ 7.69–7.66 (comp, 4 H), 7.46–7.36 (comp, 6 H), 5.18–5.17 (m, 1 H), 4.85 (dd, *J* = 2.7, 1.3 Hz, 1 H), 4.10 (s, 2 H), 3.32 (s, 2 H), 2.65 (t, *J* = 7.6 Hz, 2 H), 2.30 (t, *J* = 7.5 Hz, 2 H), 1.46 (s, 9 H), 1.07 (s, 9 H); <sup>13</sup>C NMR (100 MHz, CDCl<sub>3</sub>) δ 202.5, 166.4, 146.5, 135.5, 133.5, 129.7, 127.7, 109.3, 81.9, 66.4, 50.6, 41.1, 27.9, 26.8, 26.2, 19.2; IR (thin film) 3071 (C=C–H), 2931 (C–C–H), 1739 (C=O), 1716 (C=O) cm<sup>-1</sup>; HRMS (CI, CH<sub>4</sub>) *m/z* calcd for C<sub>28</sub>H<sub>39</sub>O<sub>4</sub>Si (M + H)<sup>+</sup> 467.2618, found 467.2615.

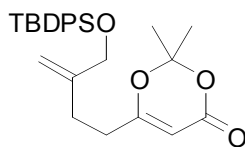

**26**

**6-(4-*tert*-Butyldiphenylsilyloxy-2-methylidenebutyl)-2,2-dimethyl-4*H*-1,3-dioxin-4-one (26).**

The  $\beta$ -keto ester **25** (0.1766 g, 0.378 mmol) was dissolved in acetone (0.14 mL, 1.9 mmol), trifluoroacetic acid (0.29 mL, 3.76 mmol), and acetic anhydride (1.8 mL, 19 mmol). After standing for 22 h, saturated aqueous NaHCO<sub>3</sub> (60 mL) was added. The solution was then extracted with CH<sub>2</sub>Cl<sub>2</sub> (4  $\times$  15 mL), and the combined organic extracts were washed with brine (20 mL), dried (Na<sub>2</sub>SO<sub>4</sub>), and concentrated *in vacuo*. The residue was purified by flash chromatography, eluting with 30% EtOAc in hexanes to give 0.1135 g (67%) of **26** as a slightly yellow oil: R<sub>f</sub> = 0.49 (40% EtOAc in hexanes); <sup>1</sup>H NMR (500 MHz, CDCl<sub>3</sub>)  $\delta$  7.66–7.64 (comp, 4 H), 7.44–7.36 (comp, 6 H), 5.17 (s, 1 H), 5.15 (d, *J* = 1.4 Hz, 1 H), 4.86 (d, *J* = 1.2 Hz, 1 H), 4.09 (s, 2 H), 2.35–2.32 (comp, 2 H), 2.31–2.24 (comp, 2 H), 1.63 (s, 6 H), 1.05 (s, 9 H); <sup>13</sup>C NMR (125 MHz, CDCl<sub>3</sub>)  $\delta$  171.2, 161.2, 145.9, 135.5, 133.3, 129.8, 127.7, 110.3, 106.3, 93.4, 66.3, 31.8, 28.7, 26.8, 25.0, 19.2; HRMS (CI, CH<sub>4</sub>) *m/z* calcd for C<sub>27</sub>H<sub>35</sub>O<sub>4</sub>Si (M + H)<sup>+</sup> 451.2305, found 451.2320.

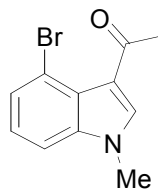

**28**

**4-Bromo-3-acetyl-1-methyl-1*H*-indole (28).**

A solution of Me<sub>2</sub>AlCl (3.0 mL of 1.0 M in hexanes, 3 mmol) was added dropwise over 10 min to a stirred solution of the 4-bromo-1-methylindole (0.308 g, 1.462 mmol) in CH<sub>2</sub>Cl<sub>2</sub> (15 mL), cooled to 0 °C. Then reaction mixture was stirred for 45 min, and acetyl chloride (0.15 mL, 2.1 mmol) in CH<sub>2</sub>Cl<sub>2</sub> (5 mL) was added over 15 min. After stirring for 1.5 h, pH 7 phosphate buffer (15 mL) was added, followed by H<sub>2</sub>O (15 mL). The phases were separated, and the aqueous portion was extracted with CH<sub>2</sub>Cl<sub>2</sub> (3  $\times$  15 mL). The combined organic extracts were washed with brine (10 mL), dried (Na<sub>2</sub>SO<sub>4</sub>), and concentrated *in vacuo*. The product was purified via column chromatography, eluting with 70% EtOAc in hexanes, to afford 0.297 g (80%) of **28** as a white solid: R<sub>f</sub> = 0.19 (60% EtOAc in hexanes); mp = 124–125 °C; <sup>1</sup>H NMR (500 MHz, CDCl<sub>3</sub>)  $\delta$  7.59 (s, 1 H), 7.44 (dd, *J* = 7.7, 0.9 Hz, 1 H), 7.22 (dd, *J* = 8.2, 0.8 Hz, 1 H), 7.08 (t, *J* = 7.9 Hz, 1 H), 3.76 (s, 3 H), 2.52 (s, 3 H); <sup>13</sup>C NMR (125 MHz, CDCl<sub>3</sub>)  $\delta$  192.1, 139.0, 136.1, 127.5, 125.2, 124.0, 118.2, 114.9,

108.9, 33.6, 29.9; IR 3106 (C=C-H), 1660 (C=O), 1106 (C-Br)  $\text{cm}^{-1}$ ; HRMS (CI,  $\text{CH}_4$ )  $m/z$  calcd for  $\text{C}_{11}\text{H}_{11}\text{NOBr}$  ( $\text{M} + \text{H}$ )<sup>+</sup> 252.0024, found 252.0032.

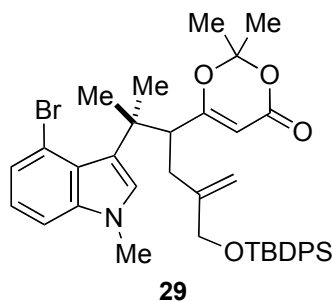

***O*-(*tert*-Butyldiphenylsilyl)-2-methylene-4-(2,2-dimethyl-4*H*-1,3-dioxin-4-one)-5-(4-bromo-1-methylindol-3-yl)-5-methyl-hexan-1-ol (29).** A solution of NaHMDS (11.7 mmol, 1.27 M in THF) was added to a stirred solution of the dioxanone **26** (1.78 g, 3.95 mmol) in THF (40 mL) at  $-78$  °C. After stirring for 45 min, TMSCl (2.5 mL, 19.7 mmol) was added, and the solution was stirred for 50 min. Then the mixture was warmed to rt, and concentrated *in vacuo*. The unpurified silyl ketene acetal **22** was then dissolved in PhMe (10 mL). In a separate flask, TMSOTf (0.35 mL, 1.93 mmol) was added to a solution of the crude indole **21** (1.08 g, 4.03 mmol) in PhMe (40 mL) at  $-78$  °C. After 2 min, the solution of **22** was added, and the mixture was stirred for 2.5 h. Then the reaction mixture was warmed to rt and stirred for 17 h before it was poured into saturated aqueous  $\text{NaHCO}_3$  (70 mL). The phases were separated, and the aqueous portion was extracted with EtOAc (3  $\times$  50 mL). The combined organic extracts were then washed with brine (50 mL), dried ( $\text{Na}_2\text{SO}_4$ ), and concentrated *in vacuo*. The product was purified via flash chromatography, eluting with 20 $\rightarrow$ 35% EtOAc in hexanes to afford 0.96 g (35% from **26**) of **29** as a colorless oil:  $R_f$  = 0.39 (40% EtOAc in hexanes);  $^1\text{H}$  NMR (500 MHz,  $\text{CDCl}_3$ )  $\delta$  7.59–7.51 (m, 4 H), 7.40–7.31 (m, 7 H), 7.20 (dd,  $J$  = 8.2, 1.0 Hz, 1 H), 6.98 (t,  $J$  = 7.9 Hz, 1 H), 6.89 (s, 1 H, C2), 5.24 (br s, 1 H), 5.09 (s, 1 H), 4.82 (s, 1 H), 4.17 (d,  $J$  = 12.1 Hz, 1 H), 3.97 (br s, 1 H), 3.67 (s, 3 H), 2.25 (t,  $J$  = 13.3 Hz, 1 H), 1.68–1.36 (m, 14 H), 0.94 (s, 9 H);  $^{13}\text{C}$  NMR (125 MHz,  $\text{CDCl}_3$ )  $\delta$  172.6, 161.2, 145.4, 139.9, 135.5, 135.4, 133.54, 133.48, 129.62, 129.58, 127.6, 125.9, 122.4, 122.3, 113.7, 110.3, 109.0, 105.9, 66.0, 48.9, 38.0, 34.1, 33.0, 30.3, 26.7, 25.5, 24.9, 22.3, 19.2, 14.0; IR 2958, 2856, 1724, 1620, 1112  $\text{cm}^{-1}$ ; HRMS (CI,  $\text{CH}_4$ )  $m/z$  calcd for  $\text{C}_{39}\text{H}_{47}\text{O}_4\text{SiBr}$  ( $\text{M} + \text{H}$ )<sup>+</sup> 700.2458, found 700.2462.

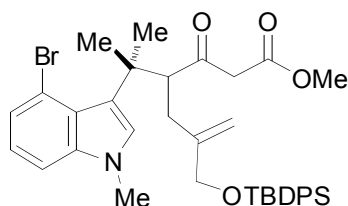

**3-Oxo-4-[1',1'-dimethyl-1'(4-bromo-1-methylindol-3-yl)-methyl]-6-methylene-7-(tert-butylidiphenylsilyloxy)-heptanoate methyl ester.** The dioxanone **29** (960 mg, 1.37 mmol) was heated in a stirred mixture of MeOH (5.5 mL) and PhMe (110 mL) to 110 C. After 21 h, the reaction mixture was cooled to rt and concentrated *in vacuo*. The residue was purified by flash chromatography, eluting with 25% EtOAc in hexanes to afford 871 mg (94%) of ketoester as an oil:  $R_f = 0.50$  (40% EtOAc in hexanes);  $^1\text{H NMR}$  (400 MHz,  $\text{CDCl}_3$ )  $\delta$  7.64–7.52 (m, 4 H), 7.42–7.32 (m, 7 H), 7.26 (d,  $J = 7.9$  Hz, 1 H), 7.04 (t,  $J = 7.9$  Hz, 1 H), 6.92 (s, 1 H), 5.15 (s, 1 H), 4.84 (s, 1 H), 4.51 (dd,  $J = 11.8, 1.9$  Hz, 1 H), 4.04 (br s, 2 H), 3.71 (s, 3 H), 3.58 (s, 3 H), 3.05 (br s, 2 H), 2.52–2.38 (m, 2 H), 1.70–1.46 (m, 7 H), 1.00 (s, 9 H);  $^{13}\text{C NMR}$  (100 MHz,  $\text{CDCl}_3$ )  $\delta$  207.0, 167.5, 146.3, 140.2, 135.7, 133.8, 129.8, 129.3, 127.9, 126.1, 123.0, 122.5, 122.0, 113.7, 110.6, 109.4, 66.1, 57.5, 52.0, 39.0, 38.1, 33.4, 27.0, 19.5; IR 2955, 2856, 1749, 1708, 1112, 1075  $\text{cm}^{-1}$ ; HRMS (CI,  $\text{CH}_4$ )  $m/z$  calcd for  $\text{C}_{37}\text{H}_{44}\text{O}_4\text{NSiBr}$  ( $\text{M}^+$ )<sup>+</sup> 673.2223, found 673.2220.

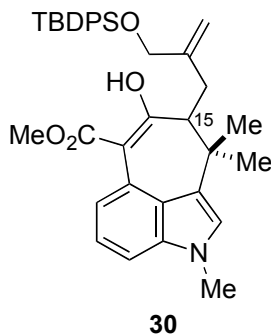

**(Z)-Methyl 8,9-dihydro-7-hydroxy-8-(2-(tert-butylidiphenylsilyloxymethyl)allyl)-2,9,9-trimethyl-2H-cyclohepta[cd]indole-6-carboxylate (30).**  $\text{NaOtBu}$  (0.252 g, 2.624 mmol) was added to a solution of the above ketoester (890 mg, 1.319 mmol) in PhMe (20 mL). The solution was then degassed (freeze-pump-thaw  $\times 2$  cycles), and  $\text{Pd}(\text{OAc})_2$  (30.0 mg, 0.134 mmol) and tri-*tert*-butylphosphine (0.4 mL, 0.4 mmol, 1 M in PhMe) were added. The solution was partitioned into four microwave vials (previously purged with argon twice). Each vial was heated to 150 °C in the microwave for 5 min (80 W, 20 psi), and cooled to rt. The reaction mixtures were combined, added to 0.5 M HCl (30 mL), and extracted with EtOAc (3  $\times$  30 mL). The combined organic extracts were washed with brine (20 mL), dried ( $\text{Na}_2\text{SO}_4$ ), and concentrated *in vacuo*. The product was purified via column

chromatography, eluting with 25% EtOAc in hexanes to afford 602 mg (77%) of **31** as a colorless oil:  $R_f = 0.55$  (40% EtOAc in hexanes);  $^1\text{H NMR}$  (500 MHz,  $\text{CDCl}_3$ )  $\delta$  13.64 (s, 1 H), 7.67–7.60 (m, 4 H), 7.43–7.34 (m, 7 H), 7.19–7.13 (m, 2 H), 6.81 (s, 1 H), 5.04 (s, 1 H), 4.67 (s, 1 H), 4.12 (d,  $J = 10.0$  Hz, 1 H), 4.03 (d,  $J = 10$  Hz, 1 H), 3.83 (s, 3 H), 3.74 (s, 3 H), 2.68 (dd,  $J = 11.7, 3.3$  Hz, 1 H), 1.98 (dd,  $J = 13.2, 3.3$  Hz, 1 H), 1.62 (dd,  $J = 13.2, 11.7$  Hz, 1 H), 1.56 (s, 3 H), 1.42 (s, 3 H), 1.01 (s, 9H).

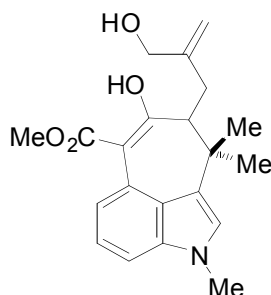

**Methyl-8,9-dihydro-7-hydroxy-8-(2-(hydroxymethyl)allyl)-2,9,9-trimethyl-2H-cyclohepta[cd]indole-6-carboxylate.** Triethylamine trihydrofluoride (1.6 mL, 9.8 mmol) was added to a stirred solution of **30** (602 mg, 1.013 mmol) and  $\text{Et}_3\text{N}$  (2.1 mL, 15 mmol) in MeCN (10 mL). After 20 h saturated  $\text{NaHCO}_3$  (15 mL) and  $\text{H}_2\text{O}$  (15 mL) were added, and the aqueous portion was extracted with  $\text{CH}_2\text{Cl}_2$  ( $3 \times 25$  mL). The combined organic extracts were washed with brine (20 mL), dried ( $\text{Na}_2\text{SO}_4$ ), and concentrated *in vacuo*. The residue was purified by flash chromatography, eluting with 40% EtOAc in hexanes to give 240 mg (67%) of allylic alcohol as an oil:  $R_f = 0.28$  (40% EtOAc in hexanes);  $^1\text{H NMR}$  (400 MHz,  $\text{CDCl}_3$ )  $\delta$  13.64 (s, 1 H), 7.25 (dd,  $J = 7.4, 1.1$  Hz, 1 H), 7.20 (t,  $J = 7.7$  Hz, 1 H), 7.15 (dd,  $J = 7.4, 1.1$  Hz, 1 H), 6.84 (s, 1 H), 4.94 (s, 1 H), 4.66 (s, 1 H), 4.02 (br s, 2 H), 3.84 (s, 3 H), 3.75 (s, 3 H), 2.73 (dd,  $J = 7.8, 2.4$  Hz, 1 H), 1.98 (dd,  $J = 9.8, 2.4$  Hz, 1 H), 1.65 (dd,  $J = 9.8, 7.8$  Hz, 1 H), 1.48 (s, 3 H), 1.49 (br s, 1 H), 1.38 (s, 3 H);  $^{13}\text{C NMR}$  (100 MHz,  $\text{CDCl}_3$ )  $\delta$  178.6, 174.6, 147.2, 137.1, 125.0, 124.9, 123.9, 121.70, 121.66, 121.1, 112.4, 107.3, 102.3, 66.2, 58.5, 52.2, 36.7, 33.0, 32.1, 31.4, 28.5; IR 3416, 2952, 1741, 1633, 1588, 1298, 1224  $\text{cm}^{-1}$ ; HRMS (CI,  $\text{CH}_4$ )  $m/z$  calcd for  $\text{C}_{21}\text{H}_{25}\text{O}_4\text{N}$  ( $\text{M}^+$ ) 355.1784, found 355.1786.

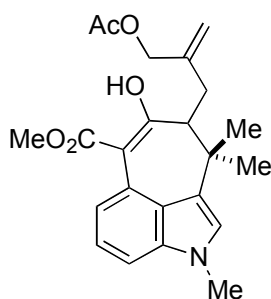

**31**

**Methyl 4-(2-(acetoxymethyl)allyl)-5-hydroxy-1,3,3-trimethyl-3,4-dihydro-1H-cyclohepta[cd]indole-6-carboxylate (32).** To a solution of the above alcohol (126 mg, 0.355 mmol) and collidine (50  $\mu$ L, 0.38 mmol) in  $\text{CH}_2\text{Cl}_2$  at  $-78^\circ\text{C}$  was added  $\text{AcCl}$  (25  $\mu$ L, 0.36 mmol) dropwise. The solution was stirred for 3.5 h, whereupon 1 N aqueous  $\text{HCl}$  (30 mL) was added. The aqueous layer was extracted with  $\text{CH}_2\text{Cl}_2$  (3 x 25 mL), and the organic layers were combined, dried ( $\text{Na}_2\text{SO}_4$ ), and concentrated under reduced pressure. The residue was purified with column chromatography, eluting with 35%  $\text{EtOAc}$  in hexanes to give 109 mg (78%) of **31** as an oil

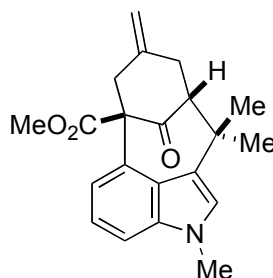

**32**

**3,3-Dimethyl-4,8-methano-6-methylene-12-oxo-cyclonon[cd]-N-methyl-indole-8-carboxylate methyl ester (32).** Sodium hydride (9.0 mg, 0.23 mmol, 60% dispersion in oil) was added to a solution of the allylic acetate **31** (82.3 mg, 0.207 mmol) in THF (6.0 mL). The solution was degassed (freeze-pump-thaw x 2 cycles) and purged with argon. The  $\text{Pd}_2(\text{dba})_3$  (8.7 mg, 9.5  $\mu$ mol) was added, then the solution was heated to  $50^\circ\text{C}$  and stirred for 17 h. After cooling to room temperature, 1 N  $\text{HCl}$  (20 mL) was added, and the aqueous mixture was extracted with  $\text{CH}_2\text{Cl}_2$  (3 x 20 mL). The combined organic extracts were washed with brine (20 mL), dried ( $\text{Na}_2\text{SO}_4$ ), and concentrated *in vacuo*. The crude product was purified by flash chromatography, eluting with 25%  $\text{EtOAc}$  in hexanes to furnish 49.9 mg (71%) of **32** as an oil:  $R_f = 0.51$  (40%  $\text{EtOAc}$  in hexanes);  $^1\text{H}$  NMR (500 MHz,  $\text{CDCl}_3$ )  $\delta$  7.21–7.15 (m, 2 H), 6.92 (s, 1 H), 6.66 (dd,  $J = 6.8, 1.6$  Hz, 1 H), 4.42 (s, 1 H), 4.29 (s, 1 H), 3.76 (s, 3 H), 3.73 (s, 3 H), 3.44 (d,  $J = 14.6$  Hz, 1 H), 2.88 (d,  $J = 13.8$  Hz, 1 H), 2.75 (dd,  $J = 8.9, 4.7$  Hz, 1 H), 2.69 (dd,  $J = 15.0, 4.2$  Hz, 1 H), 2.62 (dd,  $J = 14.8, 8.9$  Hz, 1 H), 1.48 (s, 3 H), 1.23 (s, 3 H);  $^{13}\text{C}$  NMR (125 MHz,  $\text{CDCl}_3$ )  $\delta$  209.5, 173.1, 140.0, 136.9, 130.9, 126.5, 124.8, 122.1, 120.8, 117.7, 112.9, 108.0, 69.3, 61.3, 52.3, 48.8, 35.6, 34.3, 32.9, 28.8, 14.0; HRMS (CI,  $\text{CH}_4$ )  $m/z$  calcd for  $\text{C}_{21}\text{H}_{24}\text{O}_3\text{N}$  ( $\text{M} + \text{H}$ ) $^+$  338.1756, found 338.1745.

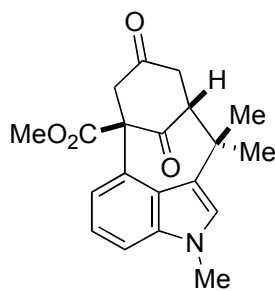

**33**

**3,3-Dimethyl-4,8-methano-6,12-oxo-cyclonon[c,d]-*N*-methyl-indole-8-carboxylate methyl ester (33).** The OsO<sub>4</sub> (2.0 mg, 7.9 μmol) and NaIO<sub>4</sub> (97.5 mg, 0.456 mmol) were added to a solution of the olefin **32** (16.1 mg, 0.0477 mmol) in THF (2.0 mL) and H<sub>2</sub>O (0.5 mL). After stirring for 22 h the solution was diluted with H<sub>2</sub>O (15 mL) and extracted with CH<sub>2</sub>Cl<sub>2</sub> (3 × 15 mL). The combined organic extracts were washed with brine (20 mL), dried (Na<sub>2</sub>SO<sub>4</sub>), and concentrated *in vacuo*. The crude product was purified by flash chromatography, eluting with 40% EtOAc in hexanes to give 10.7 mg (66%) of **33** as an oil: R<sub>f</sub> = 0.40 (50% EtOAc in hexanes); <sup>1</sup>H NMR (500 MHz, CDCl<sub>3</sub>) δ 7.23–7.21 (m, 2 H), 7.00 (s, 1 H), 6.73 (dd, *J* = 5.8, 2.6 Hz, 1 H), 3.75 (s, 3 H), 3.73 (s, 3 H), 3.51 (dd, *J* = 17.9, 0.7 Hz, 1 H), 3.24 (d, *J* = 17.9 Hz, 1 H), 2.97 (dd, *J* = 9.5, 6.6 Hz, 1 H), 2.82–2.78 (m, 2 H), 1.43 (s, 3 H), 1.33 (s, 3 H); <sup>13</sup>C NMR (125 MHz, CDCl<sub>3</sub>) δ 206.9, 205.6, 171.6, 137.4, 127.9, 127.8, 123.7, 122.6, 119.4, 118.9, 109.1, 66.7, 57.4, 53.9, 52.9, 43.2, 37.0, 32.7, 29.3, 13.9; IR (thin film) 2923, 1737, 1732, 1713, 1454, 1246 cm<sup>-1</sup>.



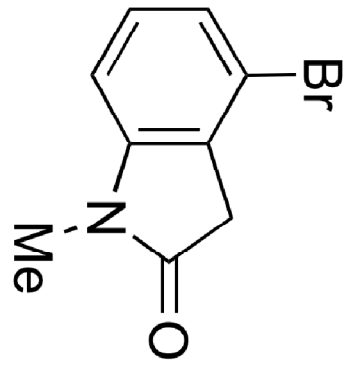

7

```

rwhj i 53 c 1
exp1 s2put1
SAMPLE
date Apr 18 2002
solvent CDC13
file exp
ACQUISITION
sfrq 499.349
tn H1
at 4.885
np 64000
sw 6577.3
fb 4000
bs 4
tpwr 54
pw 2.0
dl 2.000
tof 297.6
nt 32
ct 32
gain 40
i1 n
in n
dp y
hs nm
DISPLAY
sp -249.8
wp 5243.1
vs 34
sc 0
wc 240
hzmm 21.85
is 706.45
rf1 4129.8
rfp 3615.3
fns 2
at cdc ph 3.000
DEC. & VT
dfrq 499.349
dn H1
dpwr 30
dof 0
dm mnc
dmf c
dmm 200
dseq 1.0
dres n
homo n
temp 27.0
PROCESSING
lb 0.10
wf file
proc ft
fn math not used
wft

```

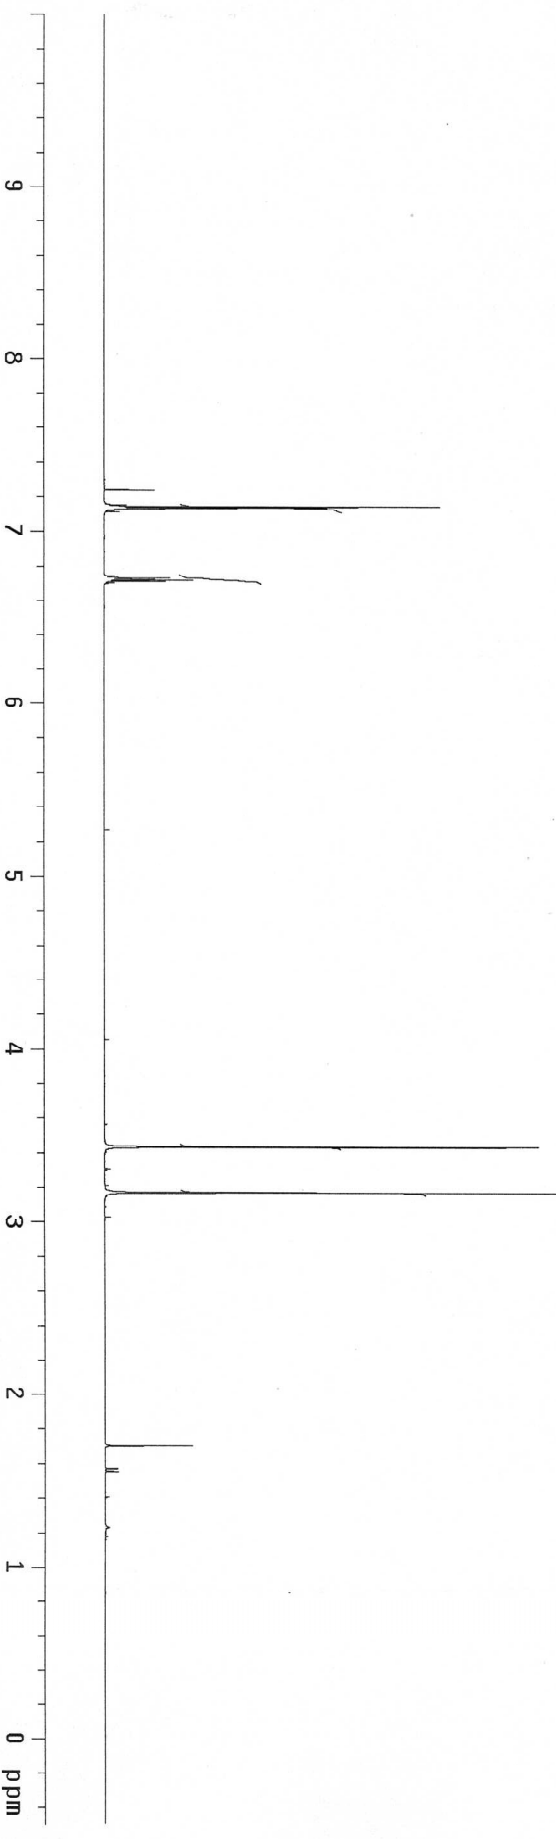

rwjh i 53 c1  
exp4 s2pu1

SAMPLE DEC. & VT  
 date Apr 18 2002 dfrq 499.349  
 solvent CDC13 dn H1  
 file exp dprw -500.0  
 ACQUISITION exp ddf -500.0  
 sfrq 125.574 dm YYY  
 ln G13 dmm W  
 at 1.073 dmf 14000  
 np 64000 dseq  
 sw 29817.4 dres 1.0  
 fb 16000 homo n  
 bs 64 temp 27.0  
 tpwr 60 PROCESSING  
 pw 4.0 lb 0.75  
 dl 2.000 wfile  
 tof 1596.2 proc ft  
 nt 5000 fn 131072  
 ct 820 math f  
 alock n  
 gain 50 werr  
 flags n wexp  
 i1 n wds  
 in n wnt  
 dp n  
 hs y

DISPLAY  
 sp -628.1  
 wd 25739.8  
 vs 133  
 sc 0  
 wc 240  
 hzmm 107.25  
 is 90000.00  
 rffl 11086.6  
 rfp 9668.2  
 th 2  
 ins 100.000  
 nm cdc ph

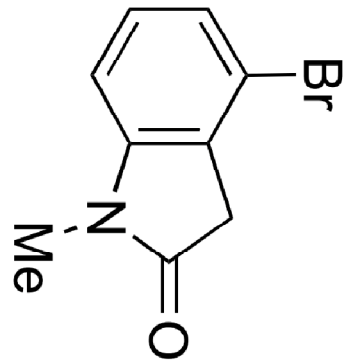

7

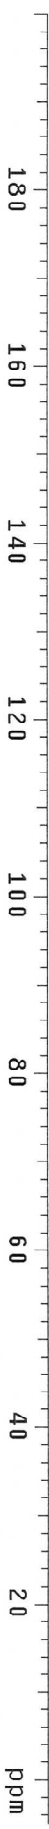

rwj I 270 cc 1  
 exp1 s2pnt1

SAMPLE DEC. & VT  
 date Apr 30 2003 dfrq 499.349  
 solvent CDCl3 dn H1  
 file CDC13 dpwr 30  
 ACQUISITION dof 0  
 sfrq 499.349 dm nm  
 tn H1 dm 200  
 at 4.865 dmf C  
 np 64000 dseq 1.0  
 sw 6577.3 dres n  
 fb 4000 homo 27.0  
 bs 32 temp  
 tpwr 54 PROCESSING 0.10  
 pw 2.0 lb wtfile  
 dl 2.000 proc  
 tof 297.6 ft  
 nt 64 fn not used  
 ct 64 math  
 alock n  
 gain 40  
 flags n  
 il n  
 in n  
 dp Y  
 hs nm

DISPLAY  
 sp -249.8  
 wp 5243.1  
 vs 81  
 sc 0  
 wc 250  
 hzmm 20.97  
 is 1430.08  
 rfl 504.6  
 rfp 0  
 th 7  
 ins 1.000  
 ai cdc ph

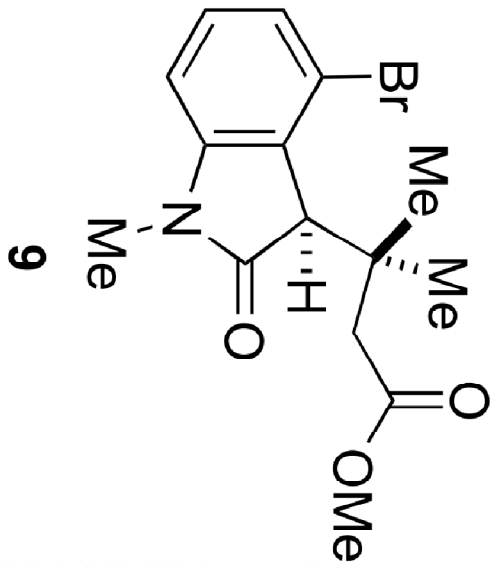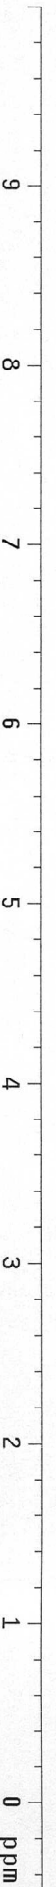

rwhj i 57 c 1

exp4 s2pul1

```

SAMPLE      DEC. & VT
date      Apr 25 2002      499.349
solvent    CDCl3          H1
file      exp             H1
ACQUISITION  -500.0      36
sfrq      125.574        YYY
          C13            W
          1.073          14000
at        6400          dseq
np        29817.4       dres
sw        16000         homs
fd        64            temp
bs        60            PROCESsing
tpwr      4.0           lb
dl        2.000         wfile
tof       1596.2        proc
nt        4000          fn
ct        1571          math
a1ock     50            n
gain      50            Werr
          n             Wexp
          n             WDS
          y             Wnt
          nh            DISPLAY
          nh            -623.1
          nh            28250.9
          nh            148
          nh            0
          nh            240
          nh            117.71
          nh            90000.00
          nh            11085.2
          nh            9668.2
          nh            2
          nh            100.000
          nm            cdc
          nm            ph
    
```

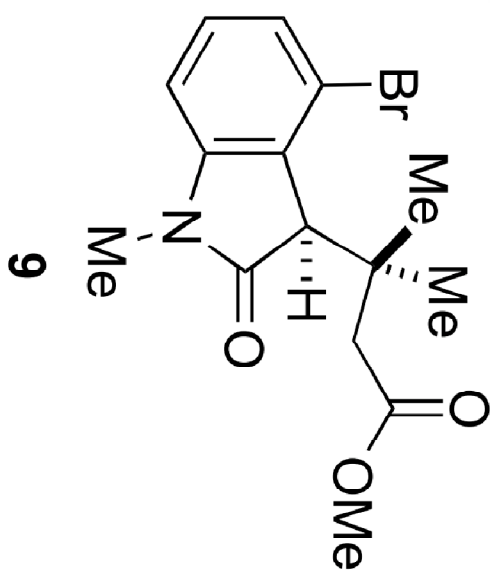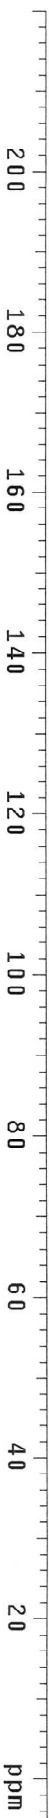

rwhj1142c1\_h1

exp1 s2pu1

```
SAMPLE Sep 11 2002 DEC. & VT 499.349
solvent 11 CDC13 dn H1
file ACQUISITION exp dpwr 30
sfrq 499.350 dm 0
in H1 dmm mn 200
at 4.865 dseq C
mp 777.42 dres 1.0
sw 7989.6 homo n
fd 4000 temp 27.0
bs 32 PROCESSING 0.10
tpwr 54 lb
pw 2.00 wf file
di 2.000 proc ft
tof 499.2 fn not used
nt 64 math f
ct 64 math f
atlock gain 40 n
flags 40 n
i1 11 n
in 11 n
dp 11 n
hs 11 n
DISPLAY -757.1
SP WD 7739.8
VS 37
SC 0
WC 250
h2mm 30.96
IS 1145.86
f1 1006.9
f2 0
f3 2
f4 1.000
ai cdc ph
```

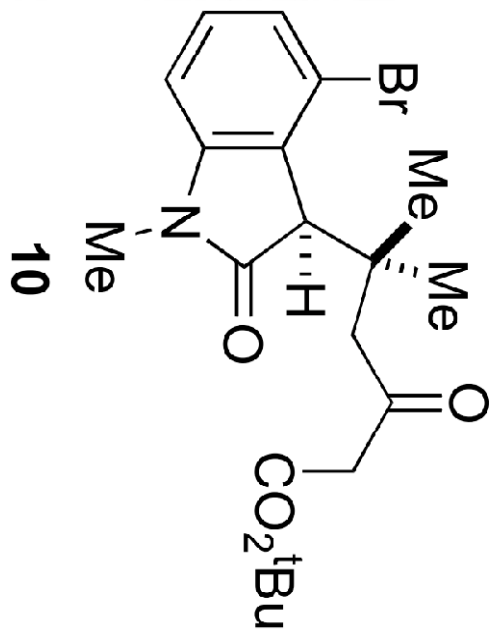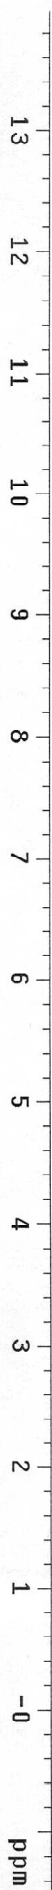

rwhj I 142 c 1

exp4 s2pu1

|             |             |            |         |
|-------------|-------------|------------|---------|
| date        | SEP 11 2002 | dfrrq      | 499.349 |
| solvent     | CDCl3       | dn         | H1      |
| file        | exp         | dpwr       | 36      |
| ACQUISITION | 125.575     | dof        | -500.0  |
| sfrfq       | 125.575     | dm         | VVV     |
| tn          | G13         | dmm        | W       |
| at          | 1.073       | dmf        | 14000   |
| np          | 70058       | dseq       |         |
| sw          | 32639.7     | dres       | 1.0     |
| fb          | 18000       | homo       | n       |
| bs          | 60          | temp       | 27.0    |
| tpwr        | 8           | PROCESSING |         |
| pw          | 4.0         | lb         | 0.75    |
| dl          | 2.000       | wfille     |         |
| tof         | 2509.7      | proc       | ft      |
| nt          | 6000        | fn         | 131072  |
| ct          | 6000        | math       | f       |
| atlock      | n           |            |         |
| gain        | 50          | werr       |         |
| FLAGS       | n           | wexp       |         |
| il          | n           | wbs        |         |
| ih          | n           | wnt        |         |
| dp          | y           |            |         |
| hs          | nm          |            |         |

  

|      |          |         |
|------|----------|---------|
| sp   | -628.0   | DISPLAY |
| wp   | 23250.9  |         |
| vs   | 327      |         |
| sc   | 0        |         |
| wc   | 250      |         |
| Hzmm | 113.00   |         |
| IS   | 90000.00 |         |
| rf1  | 11580.2  |         |
| rfp  | 9668.2   |         |
| th   | 2        |         |
| ins  | 100.000  |         |
| nm   | cdc      | ph      |

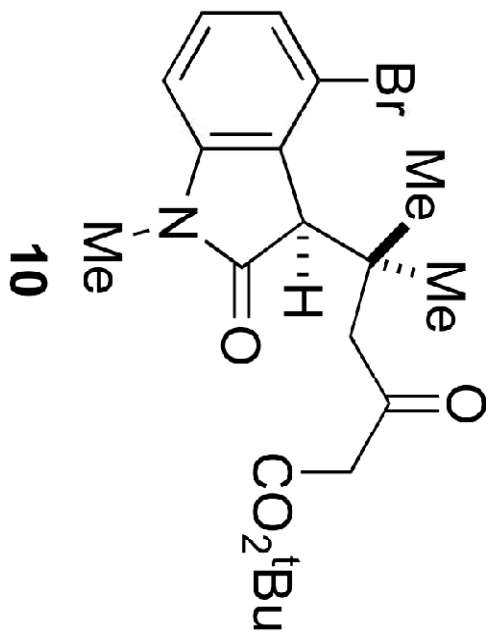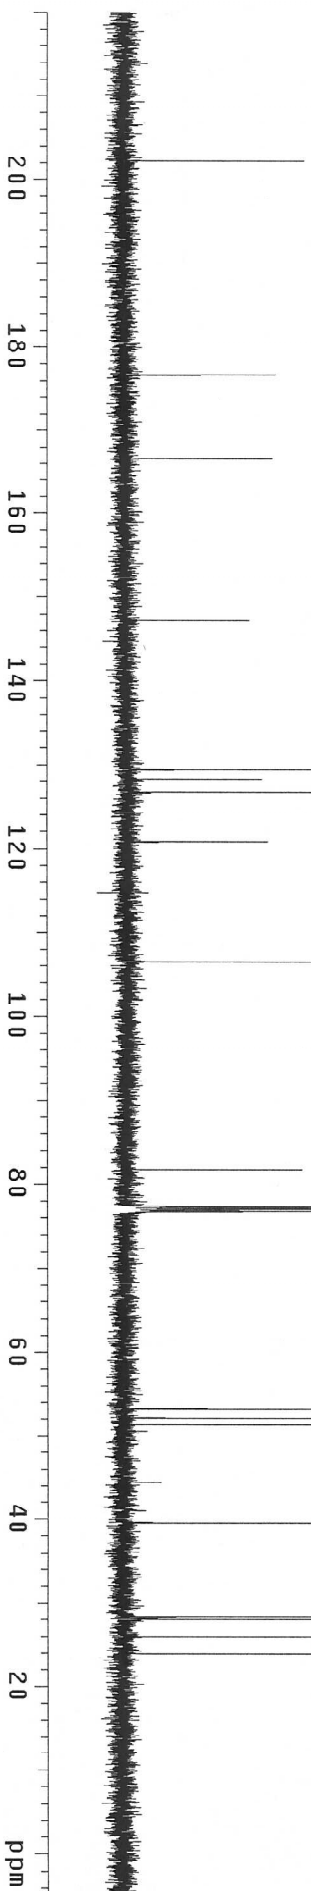

rwhj-I-107-c-1

expt1 szpu1

|             |             |            |         |
|-------------|-------------|------------|---------|
| SAMPLE      | Aug 28 2002 | DEC. & VT  | 499.349 |
| date        | Aug 28 2002 | dfrq       | H1      |
| solvent     | CDC13       | dn         | 30      |
| file        | exp         | dpwr       | 0       |
| ACQUISITION | 499.350     | dof        | 0       |
| sfrq        | H1          | dmm        | nnn     |
| tn          | H1          | dmf        | c       |
| at          | 4.865       | useq       | 200     |
| np          | 7.7742      | dres       | 1.0     |
| sw          | 7889.6      | homo       | n       |
| fb          | 4000        | temp       | 27.0    |
| bs          | 32          | PROCESSING | 0.110   |
| tpwr        | 54          | lb         | wtfile  |
| pw          | 2.000       | dl         | proc    |
| dl          | 2.000       | fn         | math    |
| tof         | 499.2       | not used   | f       |
| nt          | 64          | math       | f       |
| ct          | 64          | werr       | wft     |
| alock       | n           | wexp       | wft     |
| gain        | 40          | wbs        | wft     |
| flags       | n           | wnt        | wft     |
| il          | n           |            |         |
| in          | n           |            |         |
| dp          | y           |            |         |
| hs          | nm          |            |         |
| DISPLAY     | -249.7      |            |         |
| sp          | 6741.1      |            |         |
| wp          | 40          |            |         |
| vs          | 0           |            |         |
| sc          | 250         |            |         |
| wc          | 26.96       |            |         |
| hzmm        | 1580.92     |            |         |
| is          | 1003.7      |            |         |
| rf1         | 0           |            |         |
| rfp         | 0           |            |         |
| th          | 2           |            |         |
| ins         | 1.000       |            |         |
| ai          | cdc         |            |         |
| ph          |             |            |         |

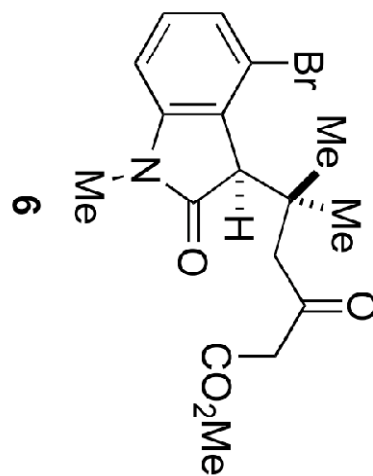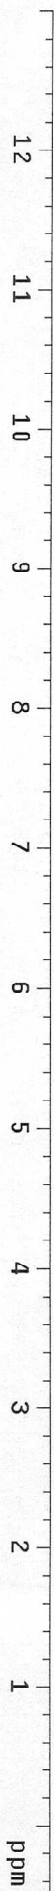

rwhj-I-107-c-1

exp4 s2pu1

|             |             |            |         |
|-------------|-------------|------------|---------|
| SAMPLE      | Aug 29 2002 | DEC. & VT  | 499.349 |
| date        | Aug 29 2002 | dn         | H1      |
| solvent     | CDCl3       | dpwr       | 35      |
| file        | exp         | dof        | -500.0  |
| ACQUISITION | exp         | dof        | YY      |
| sfreq       | 125.575     | dm         | W       |
| tn          | C13         | dmm        | 14000   |
| at          | 1.073       | dmf        |         |
| np          | 70058       | dseq       | 1.0     |
| sw          | 32539.7     | dres       | n       |
| fb          | 18000       | homo       | n       |
| bs          | 8           | temp       | 27.0    |
| tpwr        | 60          | PROCESSING | 0.75    |
| pw          | 4.0         | lb         |         |
| di          | 2.000       | wtfile     |         |
| tof         | 2509.7      | proc       | ft      |
| nt          | 4000        | fn         | 131072  |
| ct          | 831         | math       | f       |
| alock       | n           |            |         |
| gain        | 50          | verr       |         |
| flags       |             | wexp       |         |
| il          | n           | wds        |         |
| in          | n           | wnt        |         |
| dp          | y           |            |         |
| hs          | nh          |            |         |

DISPLAY

|      |          |
|------|----------|
| SP   | -528.0   |
| WD   | 28250.9  |
| VS   | 143      |
| SC   | 0        |
| WC   | 250      |
| hzm  | 113.00   |
| ts   | 90000.00 |
| rfl  | 11583.2  |
| rffp | 9568.2   |
| th   | 2        |
| ins  | 100.000  |
| nm   | cdc      |
| ph   |          |

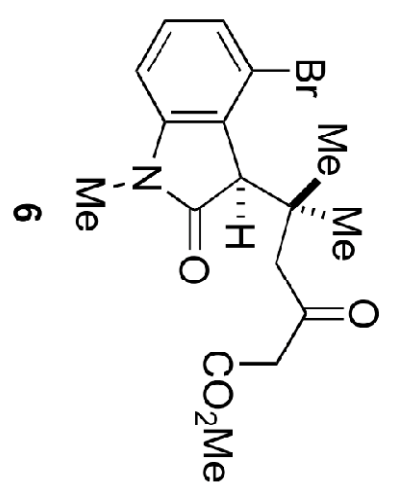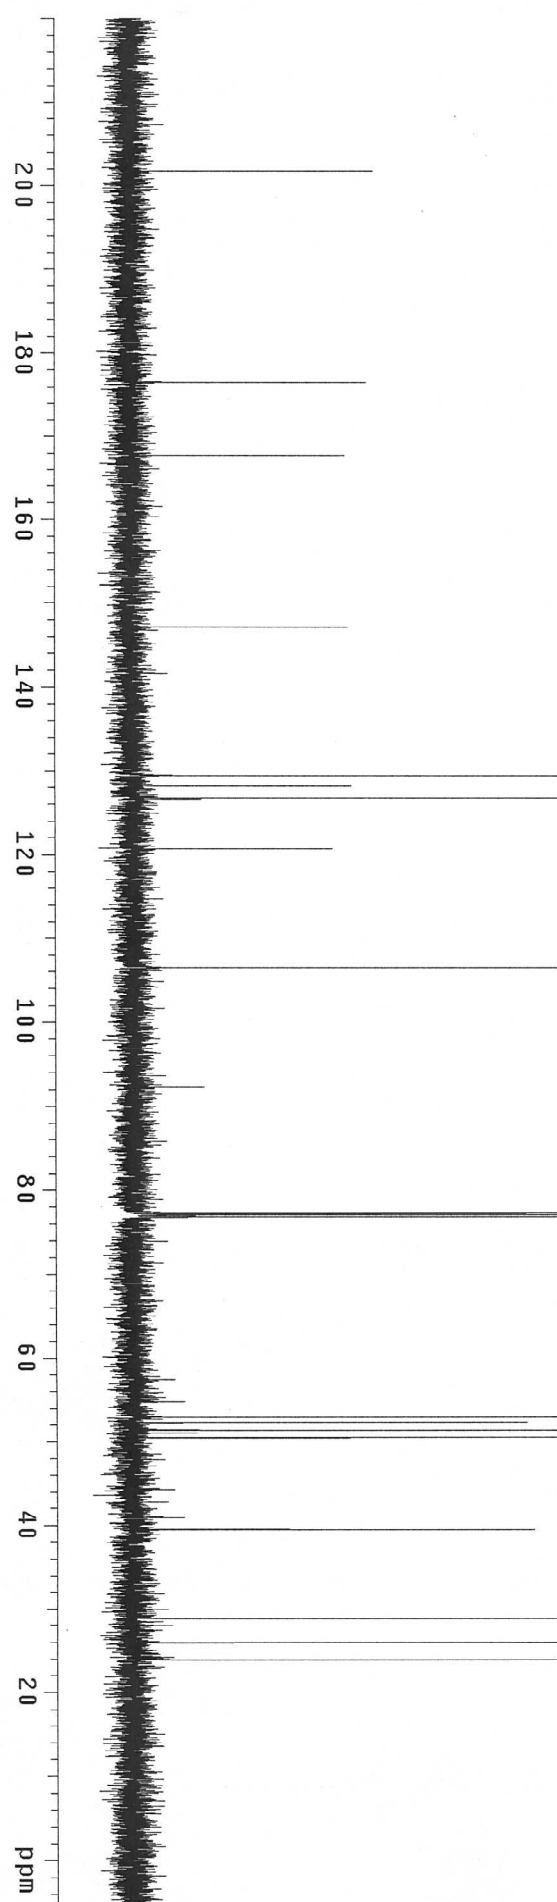



rwhj-221-c-1  
expl szpu1

SAMPLE 3 2003  
date Feb CDC13  
solvent exp  
ftitle ACQUISITION  
sfrq 499.350  
tn H1  
at 4.865  
np 89888  
sw 9237.9  
fb 5000  
bs 32  
tpwr 54  
pw 2.0  
d1 2.000  
tof 1123.4  
nt 8  
ct 8  
alock n  
gain n  
flags 40

DEC. & VT 499.349  
dfrq H1  
dn H1  
dprw 30  
dof 0  
dm nm  
dmm C  
dmf 200  
dseq  
dres 1.0  
homo  
temp 27.0  
PROCESSING 0.10  
lb  
wftitle  
proc ft  
fn not used  
math f  
wert  
wexp  
wbs  
wnt wft

DISPLAY -249.7  
SP WP 8239.2  
VS 45  
SC 0  
WC 250  
hzmm 32.96  
is 584.67  
rf1 4634.4  
rfp 3615.3  
th 2  
ins 3.000  
at cdc ph

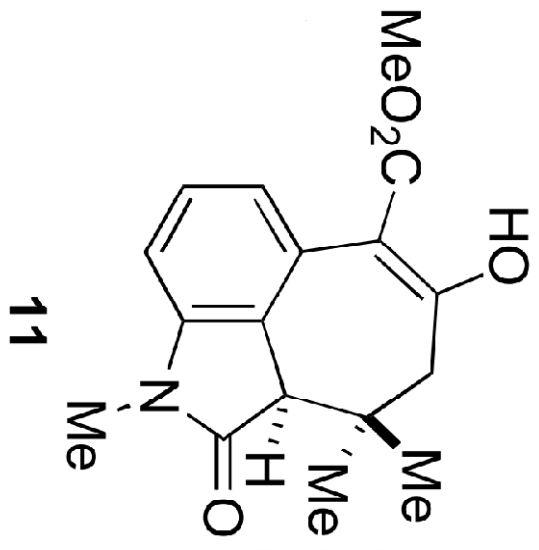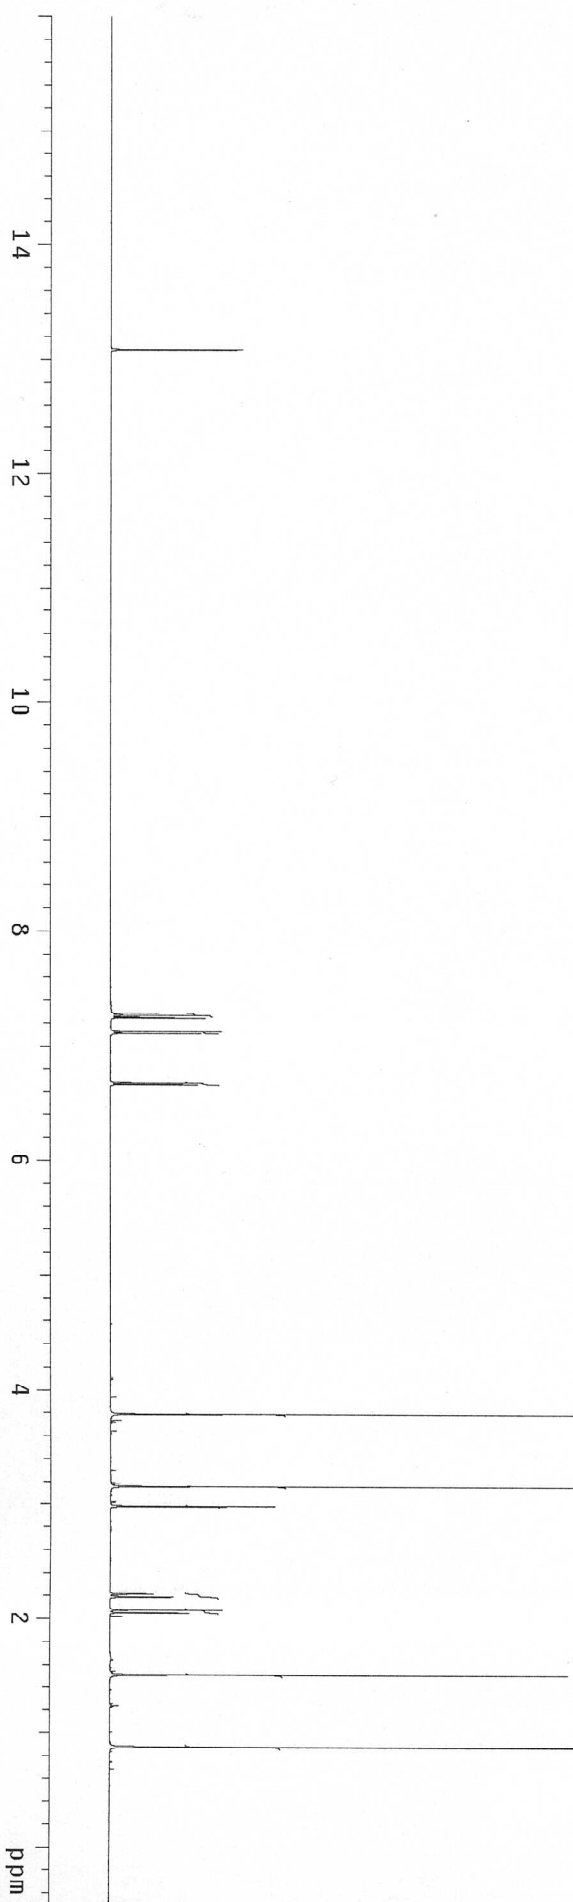

```

rwhj-221-c-1
exp4 s2pul1
SAMPLE 3 2003
date Feb CDC13
solvent exp
file ACQUISITION
sfrq 125.574
in G13
at 1.073
mp 6400
sw 29817.4
fb 16000
hs 54
tpwr 50
pw 4.0
dl 2.000
tof 1596.2
nt 2000
ct 642
alock n
gain 50
flags n
i1 n
in n
dp n
hs y
DISPLAY
sp -628.1
wp 28250.9
vs 218
sc 0
wc 250
h2mm 113.00
is 90000.00
rfl 11083.9
rfp 9658.2
th 2
ins 100.000
nm cdc ph
DEC. & VT 499.349
H1 36
-500.0
YYY
W
14000
1.0
n
27.0
PROCESSING 0.75
ft
131072
f

```

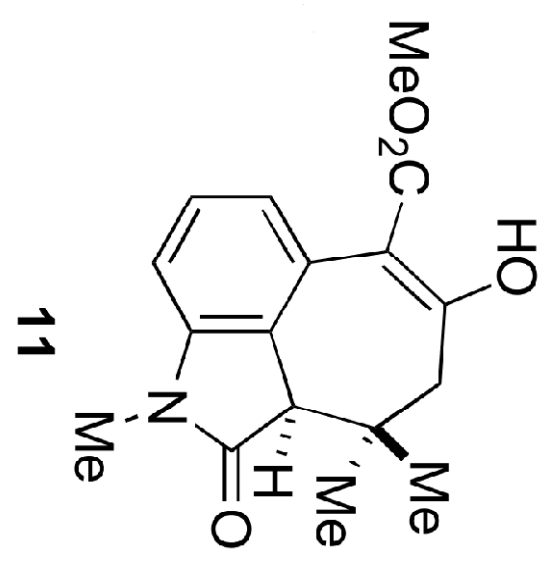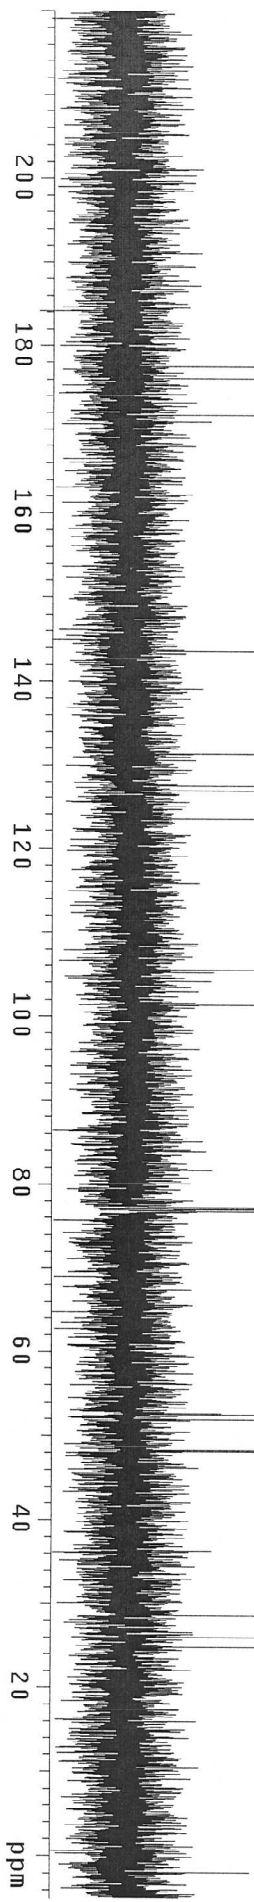

rwjh I 251 c 1

exptl s2pau1

SAMPLE

date Mar 26 2003

solvent CDC13

file exp

ACQUISITION

sfrq 499.349

tn H1

at 4.865

np 84000

sw 6577.3

fb 4000

bs 32

tpwr 54

pw 2.0

d1 2.000

tof 297.6

nt 64

ct 64

atlock n

gain n

il n

in n

dp y

hs nm

DISPLAY

sp -249.8

wp 5243.1

vs 135

sc 0

wc 250

h2mm 20.97

is 2107.84

rt1 4129.8

rtf 3625.3

th 0

ins 1.000

ai cdc ph

DEC. & VT

dfrq 499.349

dn H1

dpwr 30

dof 0

dm mnm

dmm C

dmf 200

dseq 200

dres 1.0

homo n

temp 27.0

PROCESSING

lb 0.10

wf file

proc not used

fn math

weff wft

wexp wft

wbs wft

wnt wft

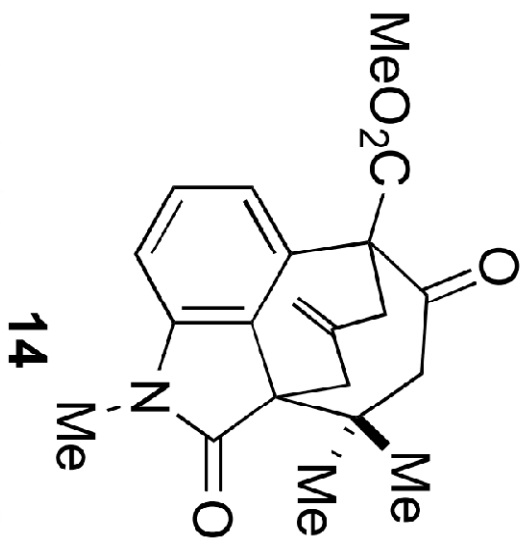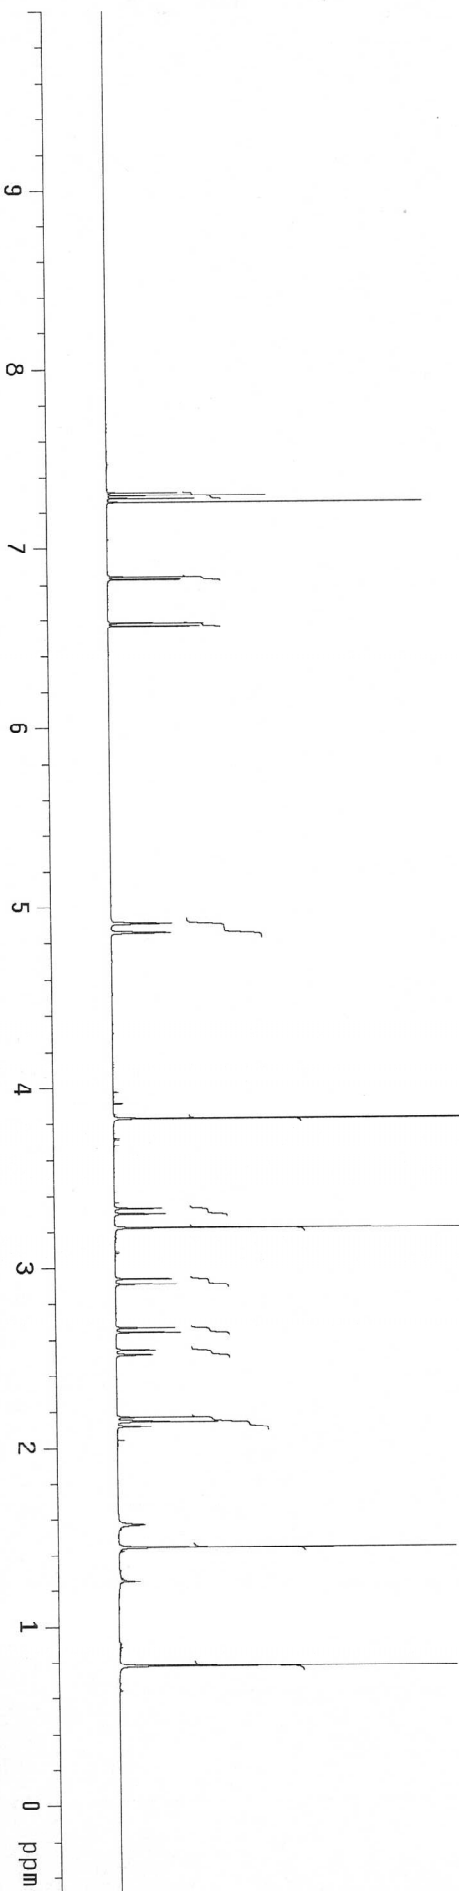

rwj I 251 c 1

exp9 s2put1

|             |             |        |            |
|-------------|-------------|--------|------------|
| date        | Mar 26 2003 | dfreq  | 499.349    |
| solvent     | CDCl3       | dn     | H1         |
| file        | exp         | dpwr   | 44         |
| ACQUISITION | 125.574     | doF    | -500.0     |
| sfreq       | 125.574     | dm     | yyy        |
| ln          | C13         | dmm    | w          |
| at          | 1.073       | dmt    | 11000      |
| np          | 64000       | dseq   | 1.0        |
| sw          | 29817.4     | dres   | n          |
| fb          | 16000       | homo   | 27.0       |
| bs          | 64          | temp   | PROCESSING |
| tpwr        | 5.4         | lb     | 0.75       |
| pw          | 3.0         | wtfite | ft         |
| di          | 2.000       | proc   | ft         |
| TOF         | 1598.2      | fn     | 131072     |
| nt          | 2000        | math   | f          |
| ct          | 2000        |        |            |
| atlock      | n           | werr   |            |
| gain        | 50          | wexp   |            |
| flags       | n           | wbs    |            |
| il          | n           | wrt    |            |
| in          | n           |        |            |
| dp          | y           |        |            |
| hs          | nm          |        |            |

|           |            |
|-----------|------------|
| DEC. & VT |            |
| dfreq     | 499.349    |
| dn        | H1         |
| dpwr      | 44         |
| doF       | -500.0     |
| dm        | yyy        |
| dmm       | w          |
| dmt       | 11000      |
| dseq      | 1.0        |
| dres      | n          |
| homo      | 27.0       |
| temp      | PROCESSING |
| lb        | 0.75       |
| wtfite    | ft         |
| proc      | ft         |
| fn        | 131072     |
| math      | f          |
| werr      |            |
| wexp      |            |
| wbs       |            |
| wrt       |            |

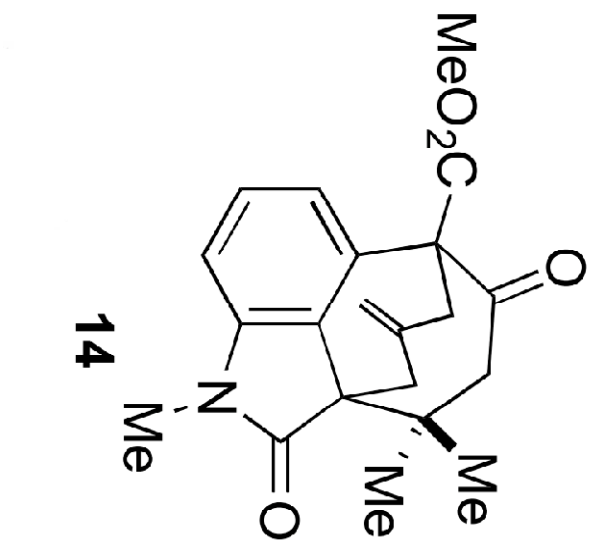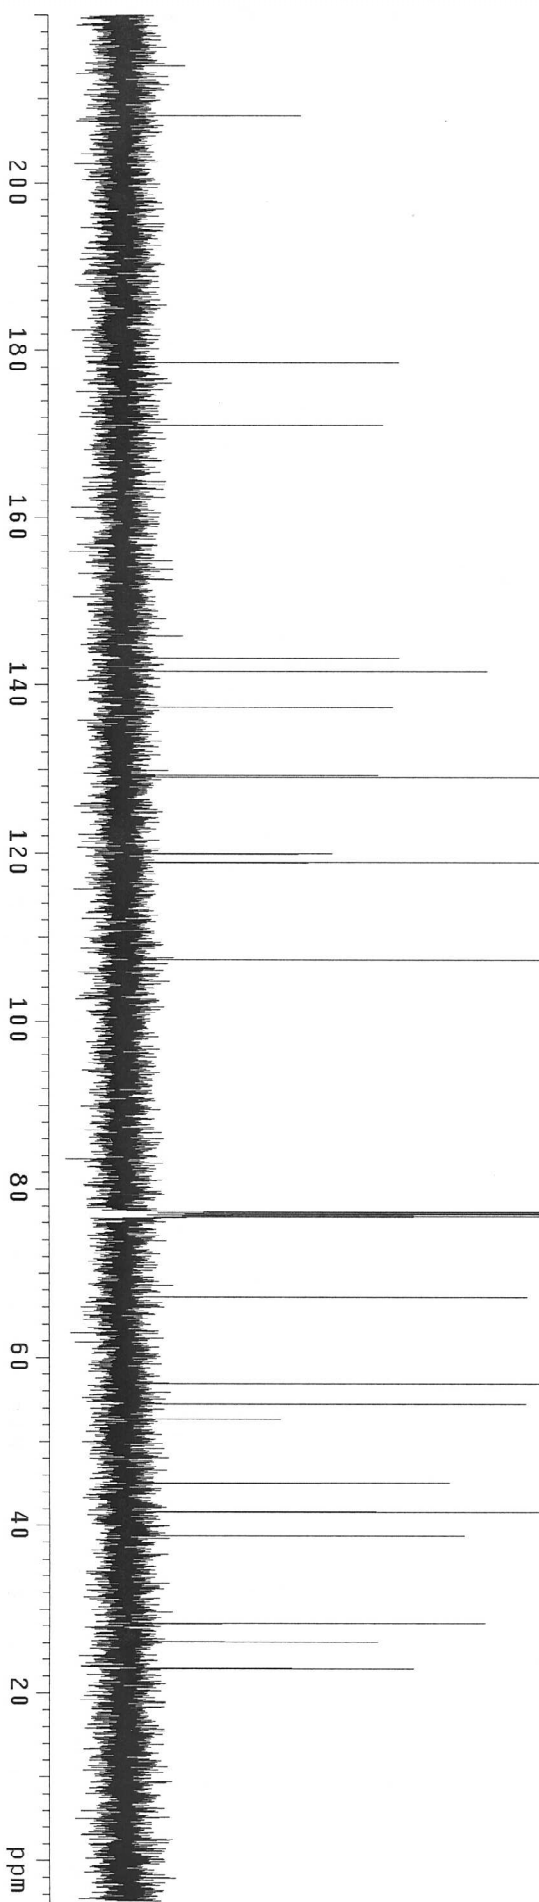

rwhj II 50 c 2

expl szpul

SAMPLE Aug 26 2003 DEC. 8 VT 499.349  
 solvent CDC13  
 FILE exp  
 ACQUISITION 499.350  
 sfrq 499.350  
 tn H1  
 at 4.855  
 np 89888  
 sw 9237.9  
 fd 50.0  
 bs 32  
 tpwr 54  
 pw 2.0  
 dl 2.000  
 tof 1123.4  
 nt 64  
 ct 64  
 alock n  
 gain 40  
 il n  
 in n  
 dp n  
 hs Y

DISPLAY -249.8  
 WP 8239.2  
 VS 85  
 SC 0  
 WC 250  
 hzmm 32.96  
 is 3084.26  
 rfl 4634.4  
 rfp 3625.3  
 th 1  
 ins 1.000  
 al cdc ph

dfreq 499.349  
 dn H1  
 dpr 30  
 dof 0  
 dm nnn  
 dmm C  
 dmf 200  
 dseq 1.0  
 dres n  
 homo 27.0  
 temp PROCESSING 0.10  
 tb wfile  
 wf 1123.4  
 proc fn  
 not used  
 math f  
 weff  
 weff  
 wbs  
 wnt

ft  
 f  
 f  
 f  
 wft

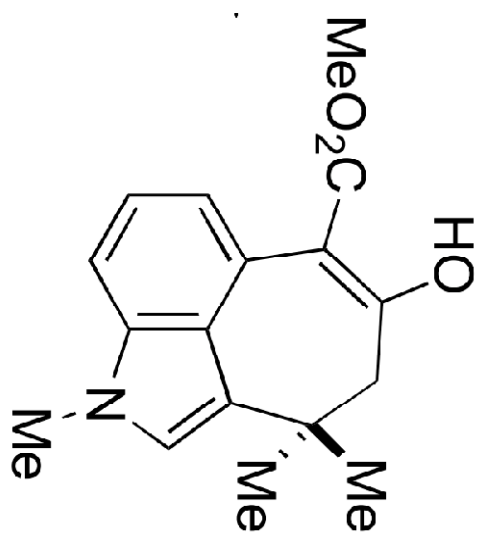

16

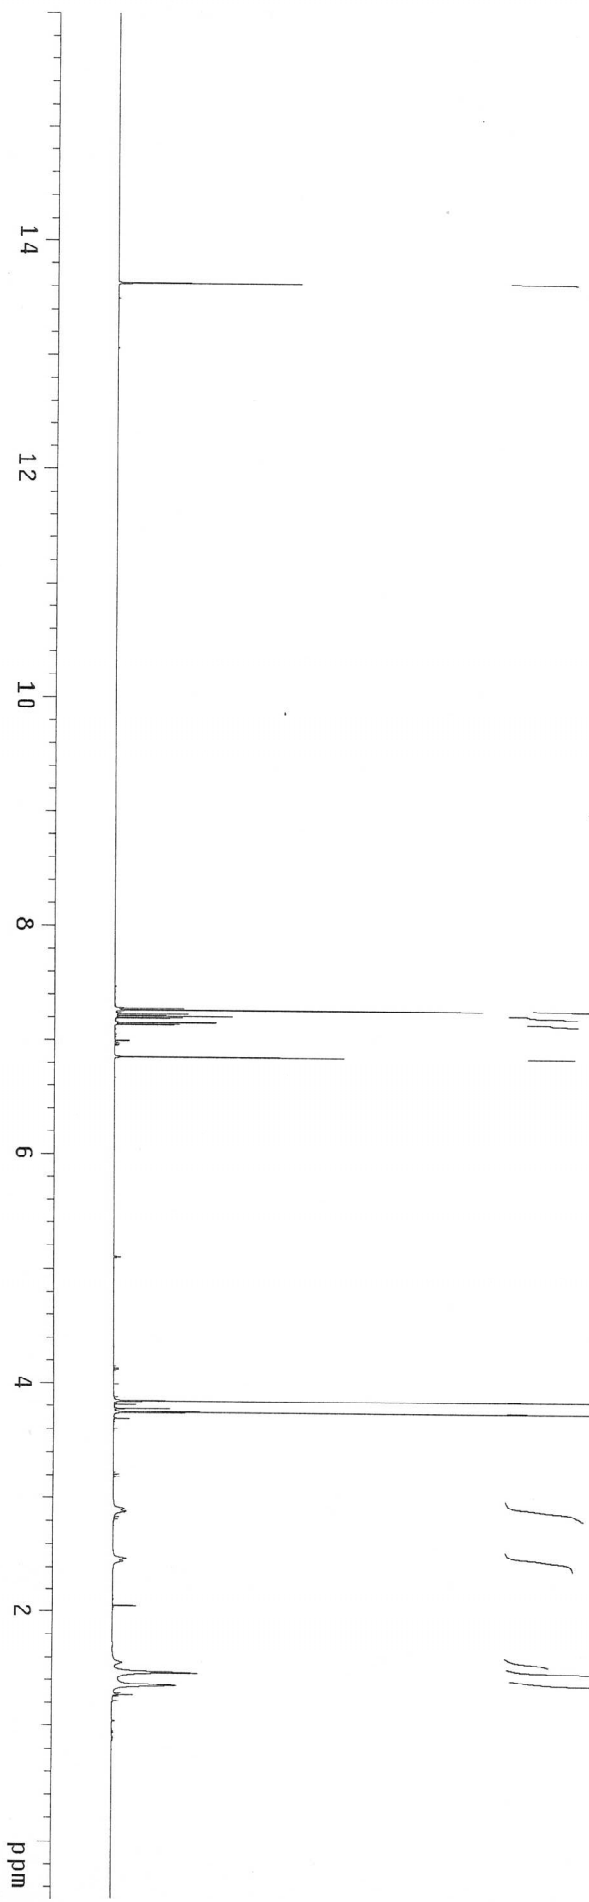

rwhj II 50 c 2

exp4 s2pul

|             |          |             |            |          |
|-------------|----------|-------------|------------|----------|
| SAMPLE      | date     | Aug 26 2003 | DEC. & VT  | 499.349  |
| solvent     | CDCl3    |             | H1         |          |
| file        | exp      |             | 36         |          |
| ACQUISITION | sfrq     | 125.575     | dm         | -500.0   |
|             | tn       |             | dmm        | YYY      |
|             | at       | 1.073       | dmf        | w        |
|             | mp       | 70058       | dseq       | 14000    |
|             | sw       | 32039.7     | dres       | 1.0      |
|             | fb       | 18000       | homo       | n        |
|             | bs       | 64          | temp       | 27.0     |
|             | tpwr     | 60          | PROCESSING | 2.00     |
|             | pw       | 4.0         | lb         |          |
|             | dl       | 2.000       | wf file    | 2.00     |
|             | tof      | 1881.9      | proc       | ft       |
|             | nt       | 14000       | fn         | not used |
|             | ct       | 13613       | math       | f        |
|             | atlock   | n           |            |          |
|             | gain     | 50          |            |          |
|             | FLAGS    |             | werr       |          |
|             | il       | n           | wexp       |          |
|             | in       | n           | wbs        |          |
|             | dp       | Y           | wnt        |          |
|             | hs       | mn          |            |          |
|             | DISPLAY  |             |            |          |
| sp          | -628.0   |             |            |          |
| wp          | 25739.7  |             |            |          |
| vs          | 781      |             |            |          |
| sc          | 0        |             |            |          |
| wc          | 250      |             |            |          |
| hzmm        | 102.96   |             |            |          |
| is          | 90000.00 |             |            |          |
| rf1         | 12208.7  |             |            |          |
| rfp         | 9668.2   |             |            |          |
| tn          | 1        |             |            |          |
| hns         | 100.000  |             |            |          |
| nm          | cdc      | ph          |            |          |

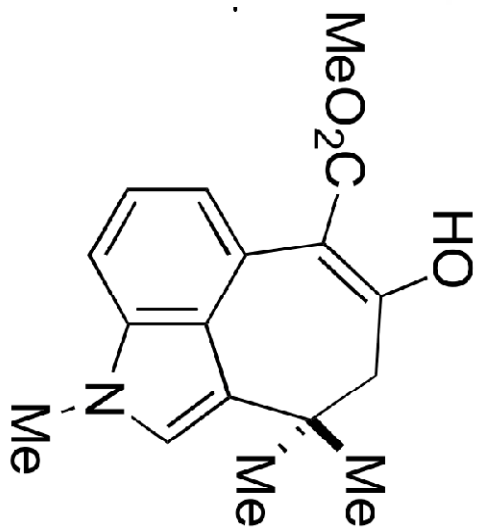

16

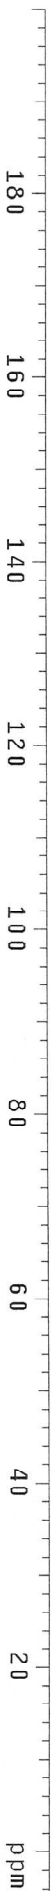

rwhj II 55 c 1  
 exp1 s2pu1

SAMPLE 2.2003 DEC. & VT 499.349  
 date Sep 2003  
 solvent CDCl3  
 file exp  
 ACQUISITION 499.350  
 sfreq 499.350  
 tn H1  
 at H1  
 np 4.885  
 sw 89888  
 fb 9237.9  
 5000  
 bs homo  
 tpwr 32  
 pw 54  
 dl 2.0  
 tof 2.000  
 1123.4  
 ne 64  
 ct 64  
 atlock n  
 gain n  
 40  
 flags n  
 il n  
 in n  
 dp n  
 hs y  
 mn  
 DISPLAY -249.8  
 sp 5243.0  
 wp 305  
 vs 0  
 sc 0  
 wc 250  
 hzmm 20.97  
 is 6546.83  
 f1 1009.3  
 f1p 0  
 th 1  
 ins 1.000  
 ai cdc ph

dfrq 499.349  
 dn H1  
 dpwr 30  
 dof 0  
 dm nnn  
 dmn c  
 dmt 200  
 dseq 1.0  
 dres n  
 homo 27.0  
 temp PROCESSING 0.10  
 lp 0.10  
 wffile ft  
 proc not used f  
 tn math  
 werr wexp  
 wbs wnt  
 wft

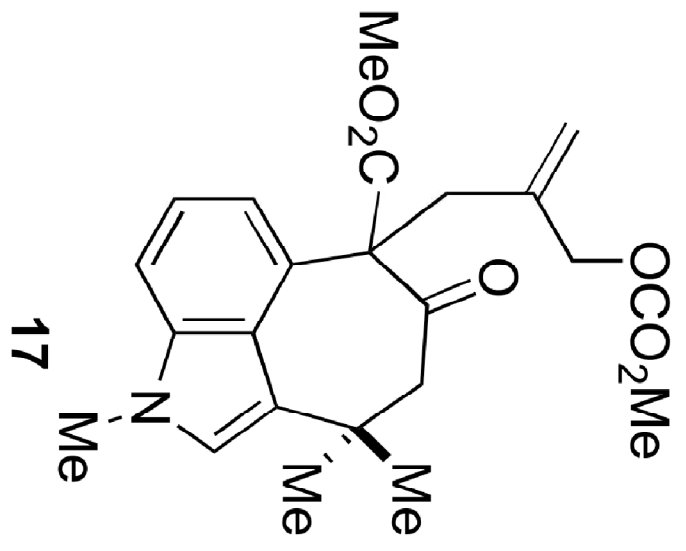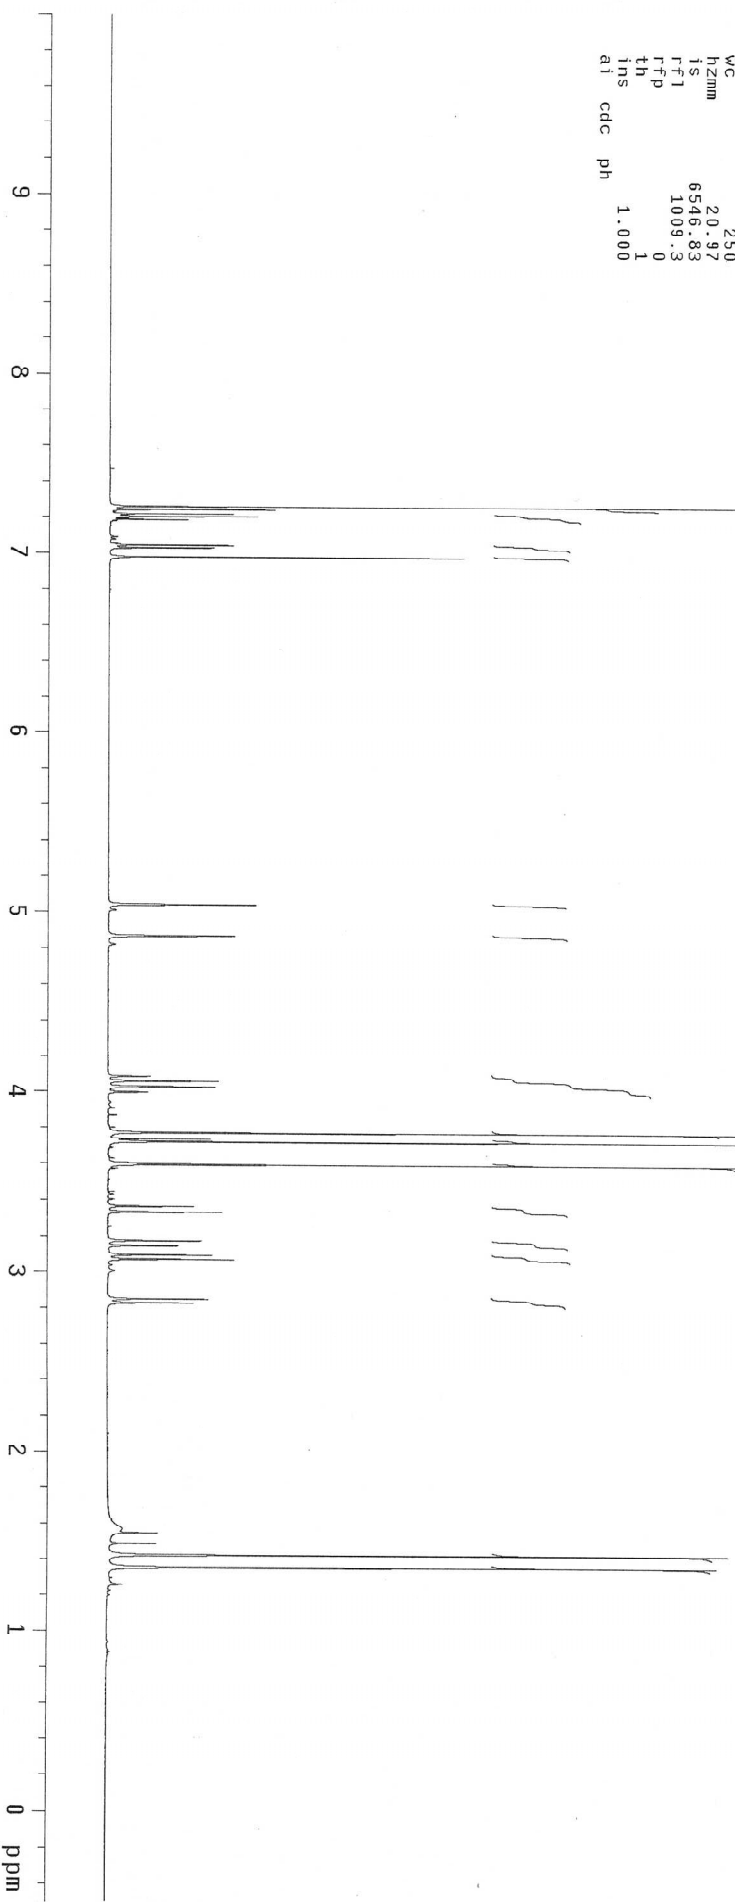

rwhj II 55 c 1

exp4 s2put1

|         |         |        |            |           |         |
|---------|---------|--------|------------|-----------|---------|
| date    | SAMPLE  | 2 2003 | dfreq      | DEC. & VI | 499.349 |
| solvent | CDCl3   | exp    | dn         | H1        | 36      |
| file    | exp     | exp    | dpwr       | -500.0    | 0       |
| dfreq   | 125.575 | dm     | dof        | yyy       | yyy     |
| at      | C13     | dm     | dm         | w         | w       |
| np      | 1.073   | dmf    | dmf        | 14000     | 14000   |
| sw      | 70058   | dseq   | dres       | 1.0       | n       |
| fb      | 32639.7 | homo   | temp       | 27.0      | n       |
| bs      | 18000   | temp   | PROCESSING | 0.75      |         |
| tpwr    | 64      | lp     | wtfile     |           |         |
| pw      | 4.0     | proc   | fn         | not used  | f       |
| tof     | 2.000   | math   | wevr       |           |         |
| nt      | 1881.9  | wevr   | wexp       |           |         |
| ct      | 10000   | wbs    | whs        |           |         |
| alock   | 10000   | whs    | whs        |           |         |
| gain    | 50      | whs    | whs        |           |         |
| il      | 50      | whs    | whs        |           |         |
| in      | n       | whs    | whs        |           |         |
| dp      | n       | whs    | whs        |           |         |
| hs      | y       | whs    | whs        |           |         |

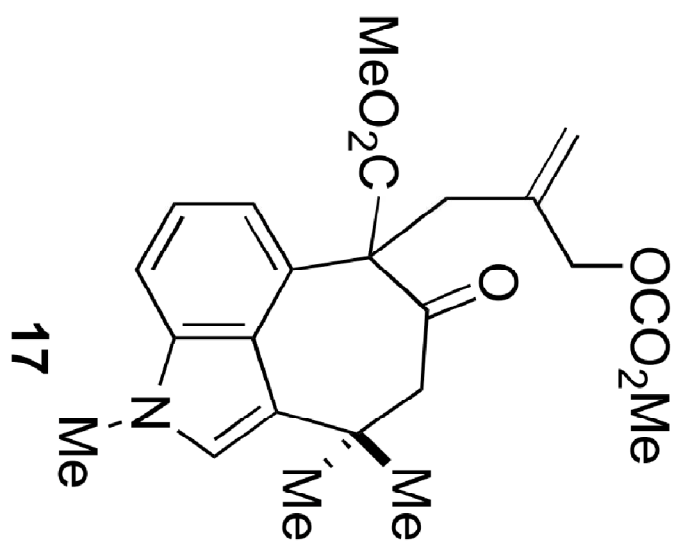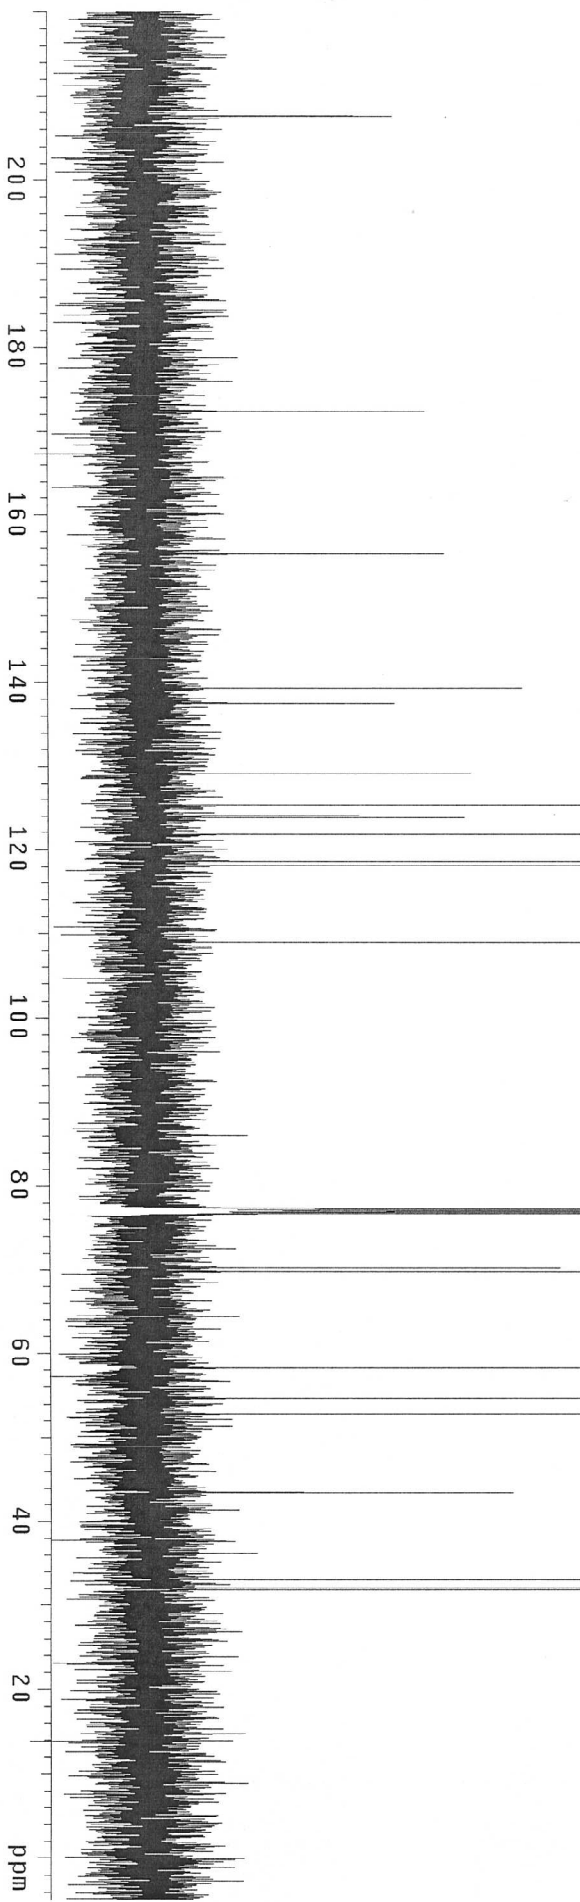



RWHJ-II-71-C-1

exp1 s2pul

DEC. & VT

499.349

SAMPLE Sep 26 2003

solvent CDCl3

file exp

ACQUISITION

sfrq 499.349

tn H1

at 4.865

mp 64000

sw 6577.3

fb 4000

bs 32

tpwr 54

pw 2.0

d1 2.000

tof 297.6

nt 64

ct 64

gain 40

flags

il n

in n

dp y

hs nm

DISPLAY

sp -249.8

wp 5243.1

vs 1109

sc 0

wc 250

h2mm 20.97

is 42938.30

rfl 4129.8

rflp 3625.3

th 1

ins 1.000

ai cdc ph

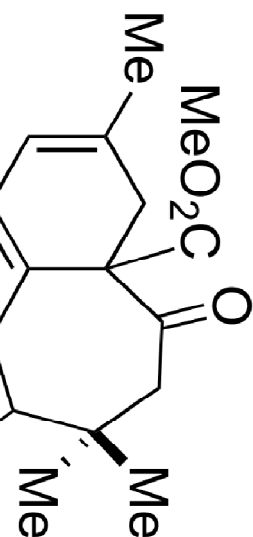

18

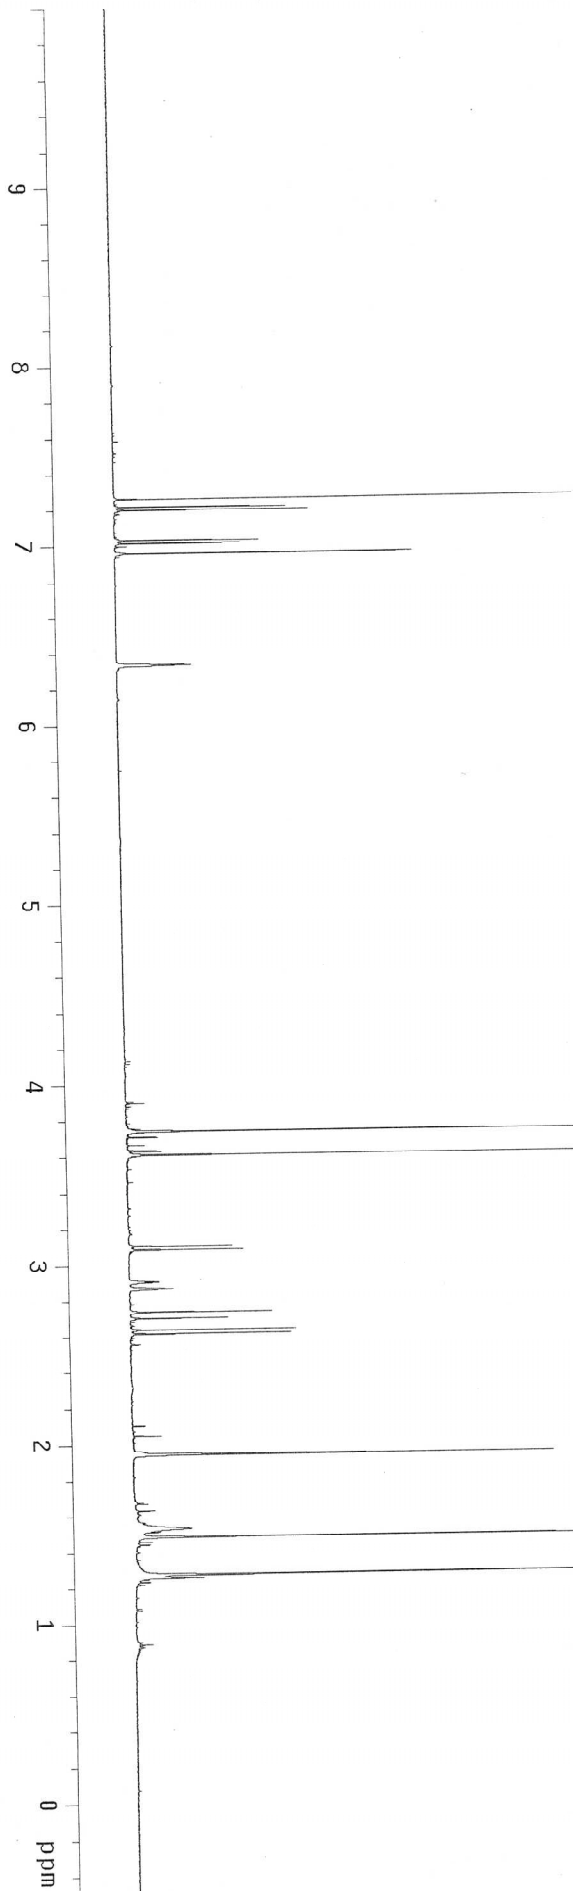

```

rwhj II 71 c1
exp4 s2pul
SAMPLE
date Sep 29 2003 dfrq DEC. & VT 499.867
solvent CDC13 dn H1
file exp dpwr H1
ACQUISITION 125.705 dm 37
sfrq 125.705 dm 0
tn C13 dmm VVY
at 1.280 dmt W
np 85262 dseq 10582
sw 33305.6 dres 1.0
fb 18000 homo 1.0
bs 64 temp 27.0
tpwr 53
pw 3.0 lb 1.00
DI 2.000 wfile
TOF 2198.1 proc ft
nt 15000 tn not used
ct 15000 math
gain 60 n
flags 60 n
il n werr
in n wexp
dp n wbs
hs y wnt
DISPLAY
sp -628.7
wp 28280.5
vs 11750
sc 0
wc 250
hzmm 113.12
ts 500.00
rtf 12220.2
rtp 9678.2
ins 1
ai cdc ph 100.000
  
```

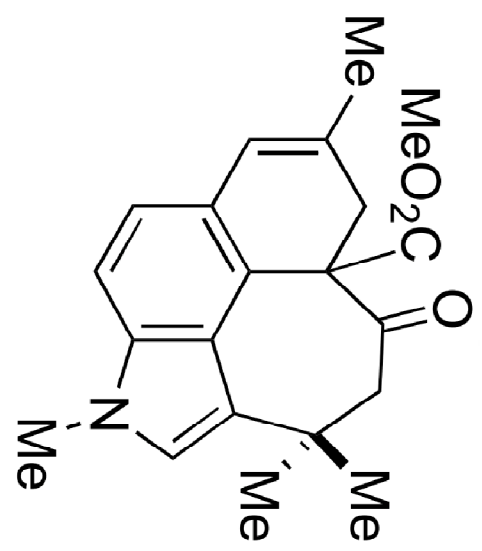

18

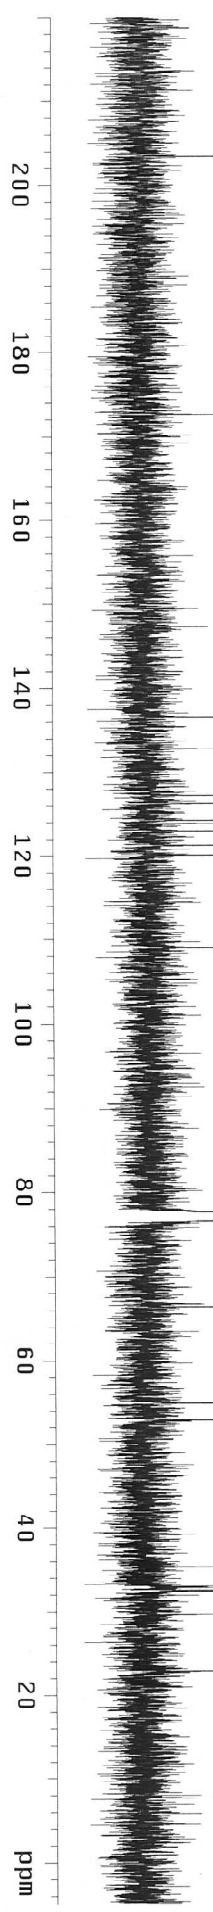

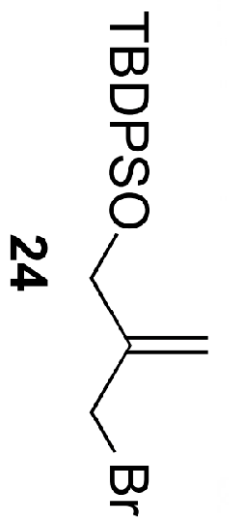

```

BMG-I-243
expl s2pul

SAMPLE
date Apr 21 2004
solvent CDCl3
file ACQUISITION
sfrq 499.349
ln H1
at 4.865
np 64000
sw 6577.3
fb 4000
bs 32
ss 4
tpwr 54
pw 2.0
dl 2.000
tof 297.6
nt 32
ct 32
atlock n
gain 40
flags n
il n
in n
dp y
hs nn

DEC. & VI
dfreq 499.349
dn H1
dpr 30
dof 0
dm mm
dmm C
dnt 200
dseq 1.0
dres n
homo 27.0
temp PROCESSING 0.10
lb wlfite
lbf 0.10
wfproc ft
fn not used
math ft
werr f
wexp f
wbs wft
wht

DISPLAY
sp -249.8
vd 5243.1
vs 43
sc 0
wc 250
hizmm 20.97
is 1109.25
rfl 4130.0
rflp 3615.3
th 7
ins 1.000
ai cdc ph

```

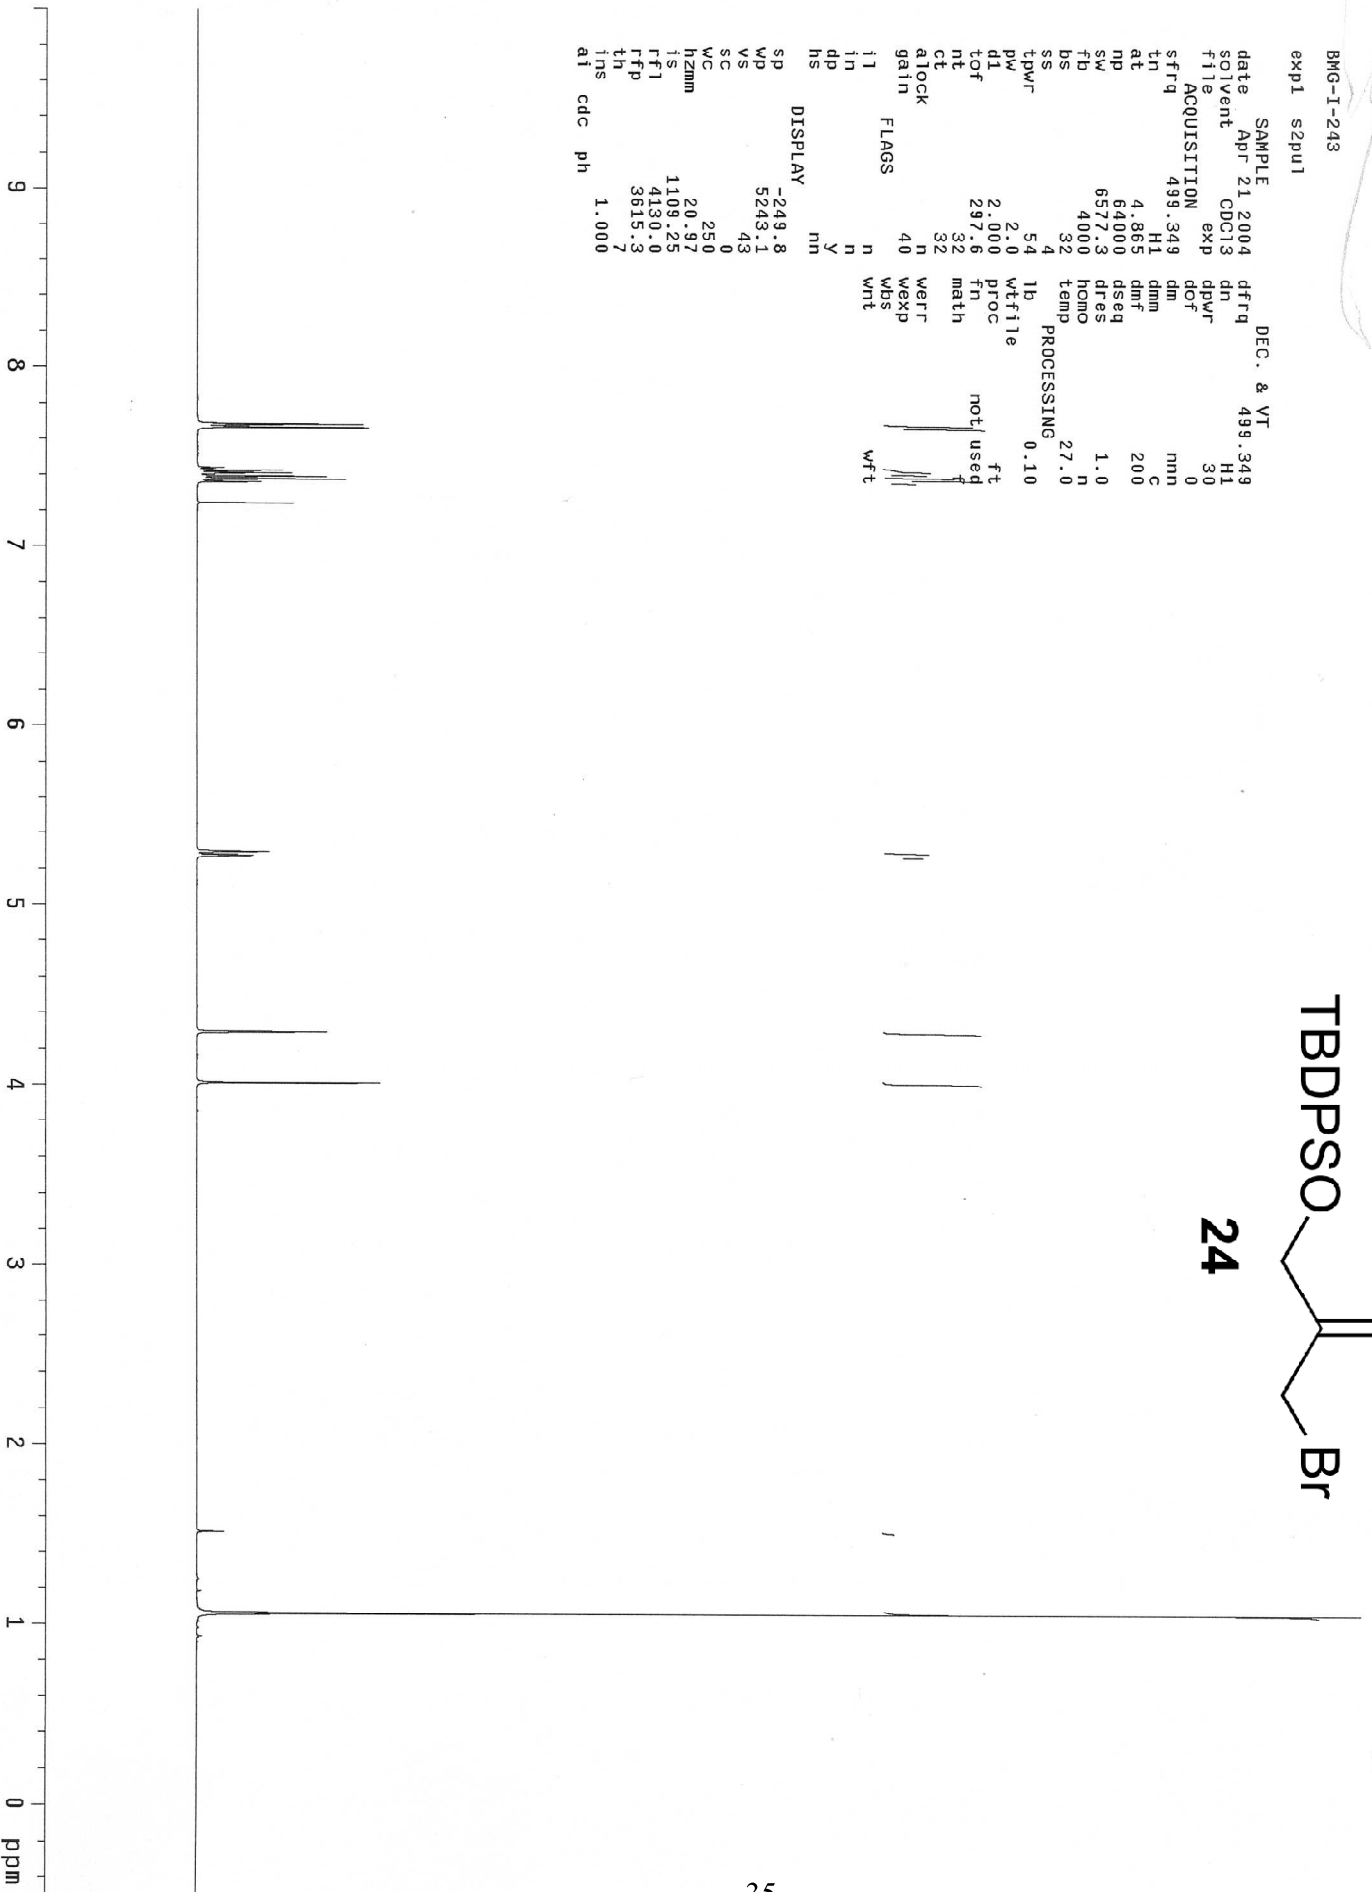

BMG-I-243

exp4 s2pul1

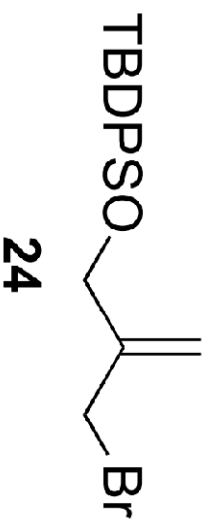

jw

| PARAMETER | VALUE       | UNIT       | DEC. & VT |
|-----------|-------------|------------|-----------|
| date      | Apr 21 2004 |            | 499.349   |
| SAMPLE    | DCDC13      | exp        | H1        |
| solvent   |             | dm         | 36        |
| file      | ACQUISITION | doF        | -500.0    |
| sfrq      | 125.575     | dm         | YYY       |
| tn        | C13         | dmm        | W         |
| at        | 1.073       | dmt        | 14000     |
| np        | 70058       | dseq       |           |
| sw        | 32539.7     | dres       | 1.0       |
| fb        | 18000       | homo       | n         |
| bs        | 64          | temp       | 27.0      |
| SS        | 128         | PROCESSING |           |
| tpwr      | 50          | 1b         | 2.00      |
| pw        | 4.0         | wfite      |           |
| dl        | 2.000       | proc       | ft        |
| tof       | 1881.9      | fn         | not used  |
| nt        | 5000        | math       | f         |
| ct        | 1511        | warf       |           |
| alock     | n           | wexp       |           |
| gain      | 50          | WBS        |           |
| fl        | n           | WMT        |           |
| in        | n           |            |           |
| dp        | y           |            |           |
| hs        | nh          |            |           |
| DISPLAY   |             |            |           |
| sp        | -528.0      |            |           |
| wd        | 25739.7     |            |           |
| vs        | 212         |            |           |
| sc        | 0           |            |           |
| wc        | 250         |            |           |
| hzmm      | 102.96      |            |           |
| is        | 90000.00    |            |           |
| rffl      | 12209.7     |            |           |
| rffp      | 9668.2      |            |           |
| th        | 9           |            |           |
| ins       | 100.000     |            |           |
| nm        | cdc         |            |           |
| ph        |             |            |           |

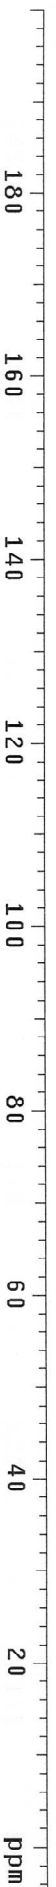

RWHJ 2 182-c-1 cdcl3

expt std1h

SAMPLE Mar 24 2004 DEC. & VT 400.269

date Mar 24 2004 dfrq 400.269

solvent CDCl3 dn H1

file exp dpwr 30

ACQUISITION dof 0

sfrq 400.269 dm mmh

tn H1 dmf c

at 2.859 H1 dmf 200

np 25130

sw 4395.6

fb not used

bs 4

tpwr 58

pw 2.0

dl 2.000

tof 0.0

nr 16

nt 16

cl 16

gain not used

alock not used

flags not used

l1 n

l2 n

l3 n

l4 n

l5 n

l6 n

l7 n

l8 n

l9 n

l10 n

l11 n

l12 n

l13 n

l14 n

l15 n

l16 n

l17 n

l18 n

l19 n

l20 n

l21 n

# TBDPSO

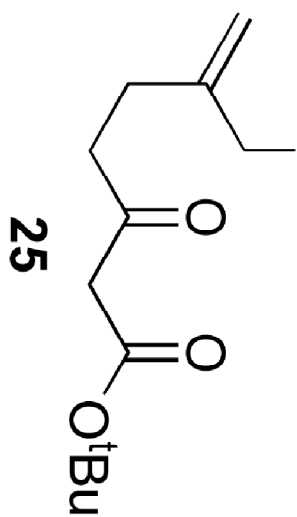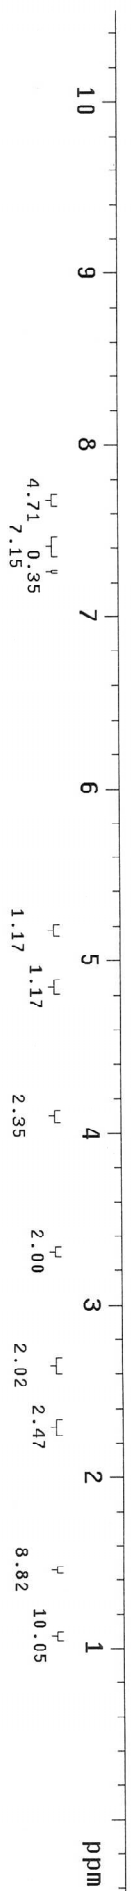

RWHD 2 171-c-1 cdcl3

exp2 std13c

# TBDPSO

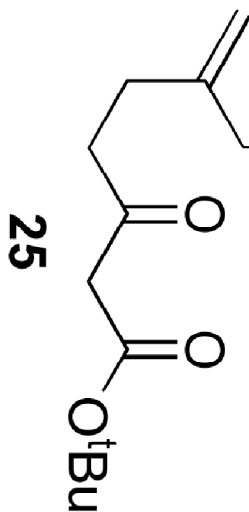

77.313  
77.000  
76.679

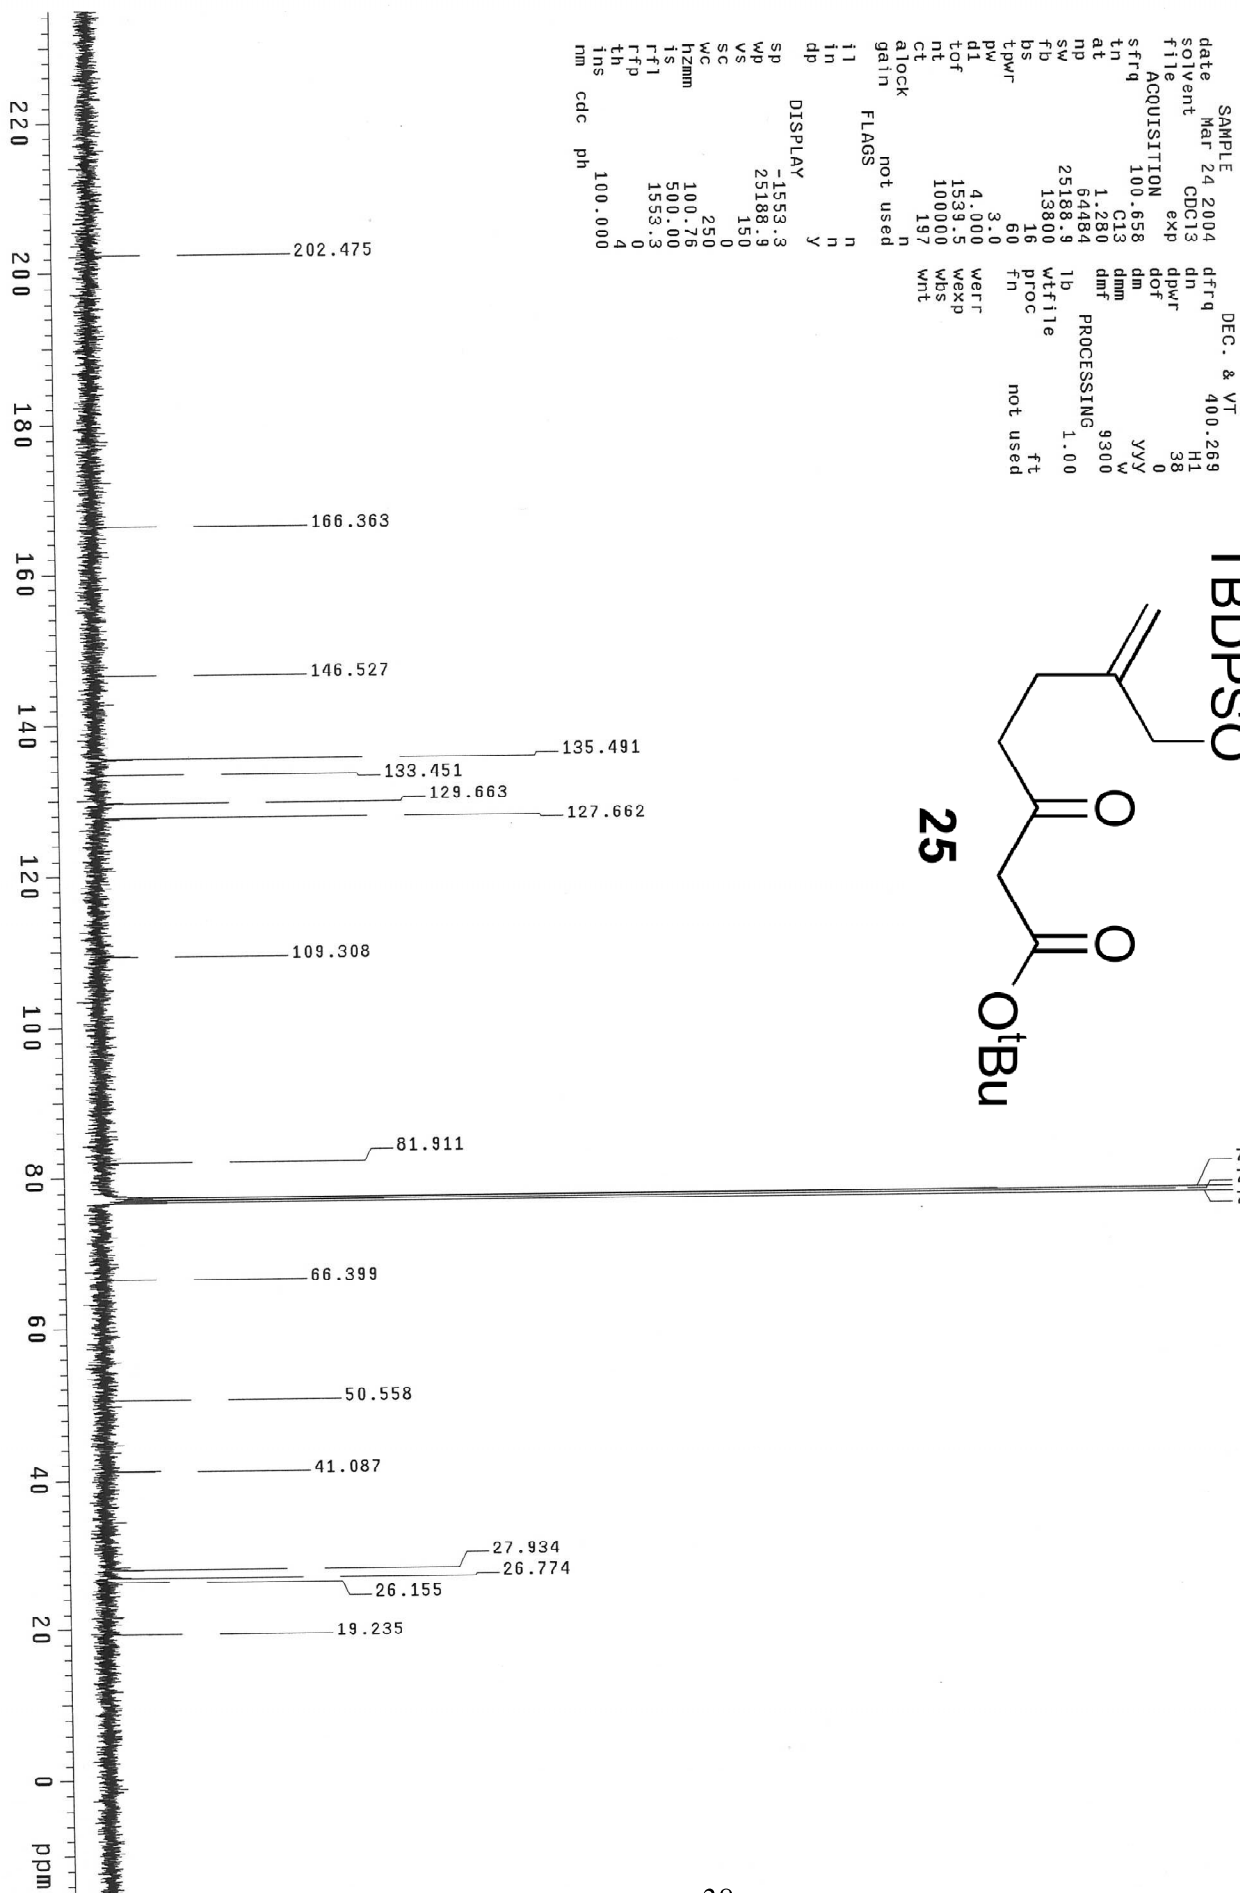

SAMPLE Mar 24 2004 DEC. & VT 400.269  
 solvent CDC13 dn H1  
 file exp 38  
 ACQUISITION YYY 0  
 sfrq 100.658 dm 9300  
 tn C13 dmm W  
 at 1.280  
 np 64484  
 sw 25188.3 lb PROCESsing 1.00  
 fb 13800 wlfite ft  
 bs 16 fn not used  
 tpmwr 3.0  
 pw 4.000 werr  
 dl 1539.5 wexp  
 tof 100000 wbs  
 nt 197 wnt  
 ct  
 alock n  
 gain not used  
 FLAGS  
 il n  
 in n  
 dp y  
 DISPLAY  
 sp 1553.3  
 wp 25188.3  
 vs 150  
 sc 0  
 wc 250  
 hzmm 100.76  
 is 500.00  
 ffl 1553.3  
 tff 0  
 th 4  
 ins 100.000  
 nm cdc ph

TBDPSO

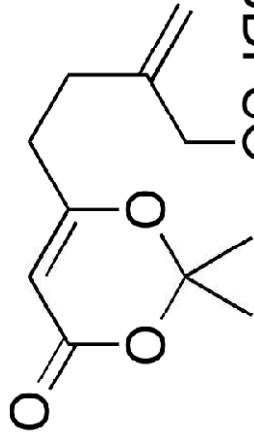

26

3w

```

BMG-I-254
exp1 s2pu1
SAMPLE date Apr 28 2004
SOLVENT CDC13
file ACQUISITION
sfrq 499.349
ln H1
at 4.865
np 64000
sw 6577.3
fb 4000
bs 32
ss 4
tpwr 54
pw 2.0
dl 2.000
tof 297.6
nt 32
ct 32
alock n
gain 40
flags n
in n
in y
dp y
hs mh
DISPLAY -249.8
sp WP 5243.1
VS 98
SC 0
WC 250
nzm 20.97
IS 2212.42
rfl 4129.8
rflp 3515.3
th 7
ins 1.000
ai cdc ph
DEC. & VT 499.349
dfrq dn H1
dpwv 30
dof 0
dim mmm
dimn c
dmt 200
dseq 1.0
dres n
homo n
temp 27.0
PROCESSING 0.10
lb 1b
wftite ft
proc fn
not used f
math
werr werr
wexp wexp
wbs wbs
wnt wnt

```

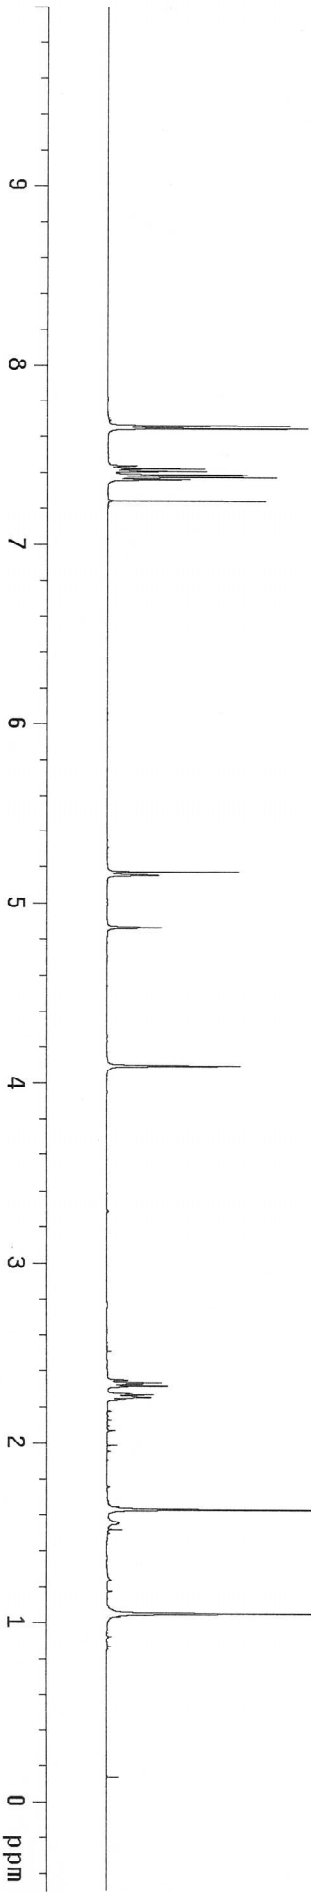

TBDPSO

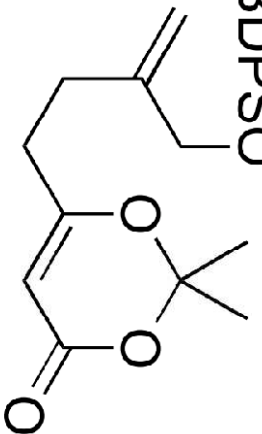

26

3w

BMG-I-254  
 exp4 s2p11  
 SAMPLE DEC. & VT  
 date Apr 28 2004 dfrrq 499.349  
 solvent CDC13 dn H1  
 file ACQUISITION exp dpwr 36  
 sfrrq 125.575 dcf -500.0  
 YYY  
 W  
 14000  
 at 1.073 dmf  
 np 70058 dseq  
 sw 32539.7 dres 1.0  
 fb 18000 homo n  
 bs 64 temp 27.0  
 ss 60 PROCESSING  
 tpwr 60 lb 2.00  
 pw 4.0 wffite  
 di 2.00 proc ft  
 tof 1881.9 fn not used  
 nt 5000 math f  
 ct 3044  
 atlock n  
 gain 50 werr  
 wbs  
 wnt  
 il n  
 in n  
 dp y  
 hs nm  
 DISPLAY  
 sp -628.0  
 wd 25739.7  
 vs 324  
 SC 0  
 WC 250  
 hzmm 102.36  
 IS 90000.00  
 rfi 12210.2  
 rfp 9668.2  
 th 11  
 ins 100.000  
 nm cdc ph

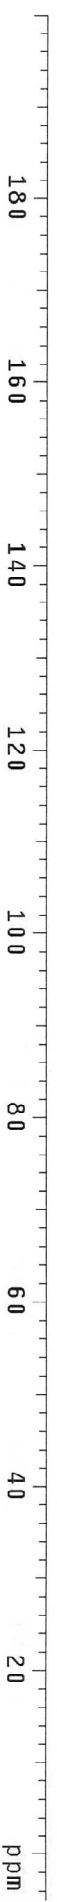



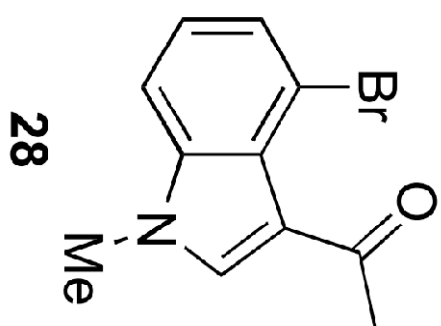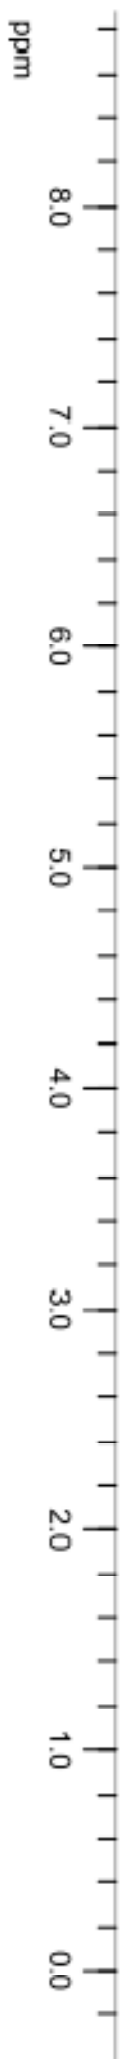

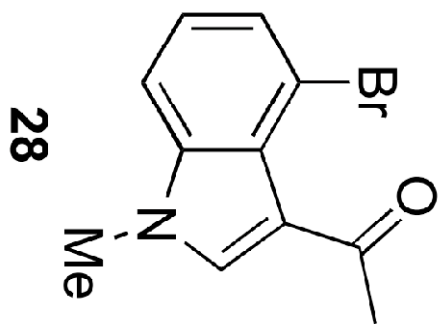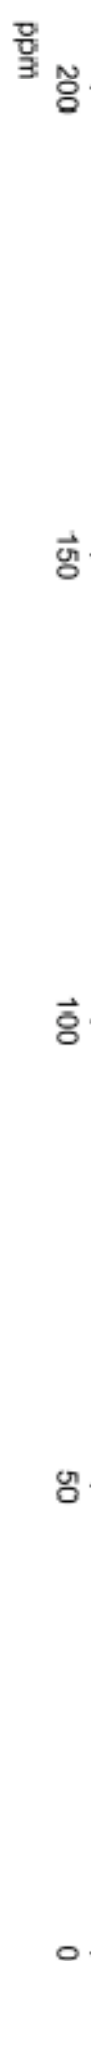

BMGVI-92

Pulse Sequence: s2pu1  
Solvent: CDCl3  
Ambient temperature  
Mercury-400BB "nmr6"

Relax. delay 2.000 sec  
Pulse 16.4 degrees  
Acq. time 2.856 sec  
Width 5602.2 Hz  
3 repetitions  
OBSERVE H1 400.2669784 MHz  
DATA PROCESSING  
Line broadening 0.1 Hz  
FT size 32768  
Total time 0 min, 0 sec

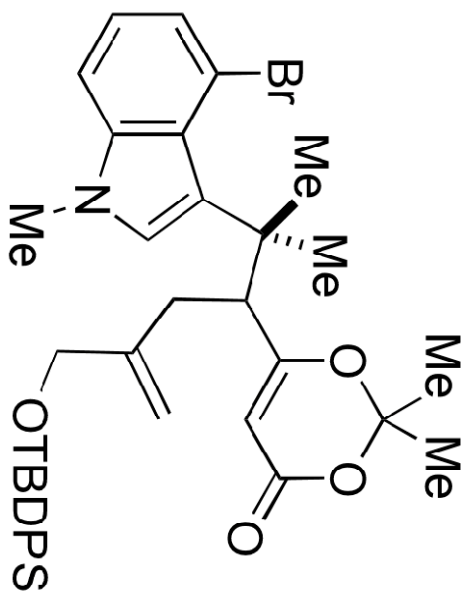

29

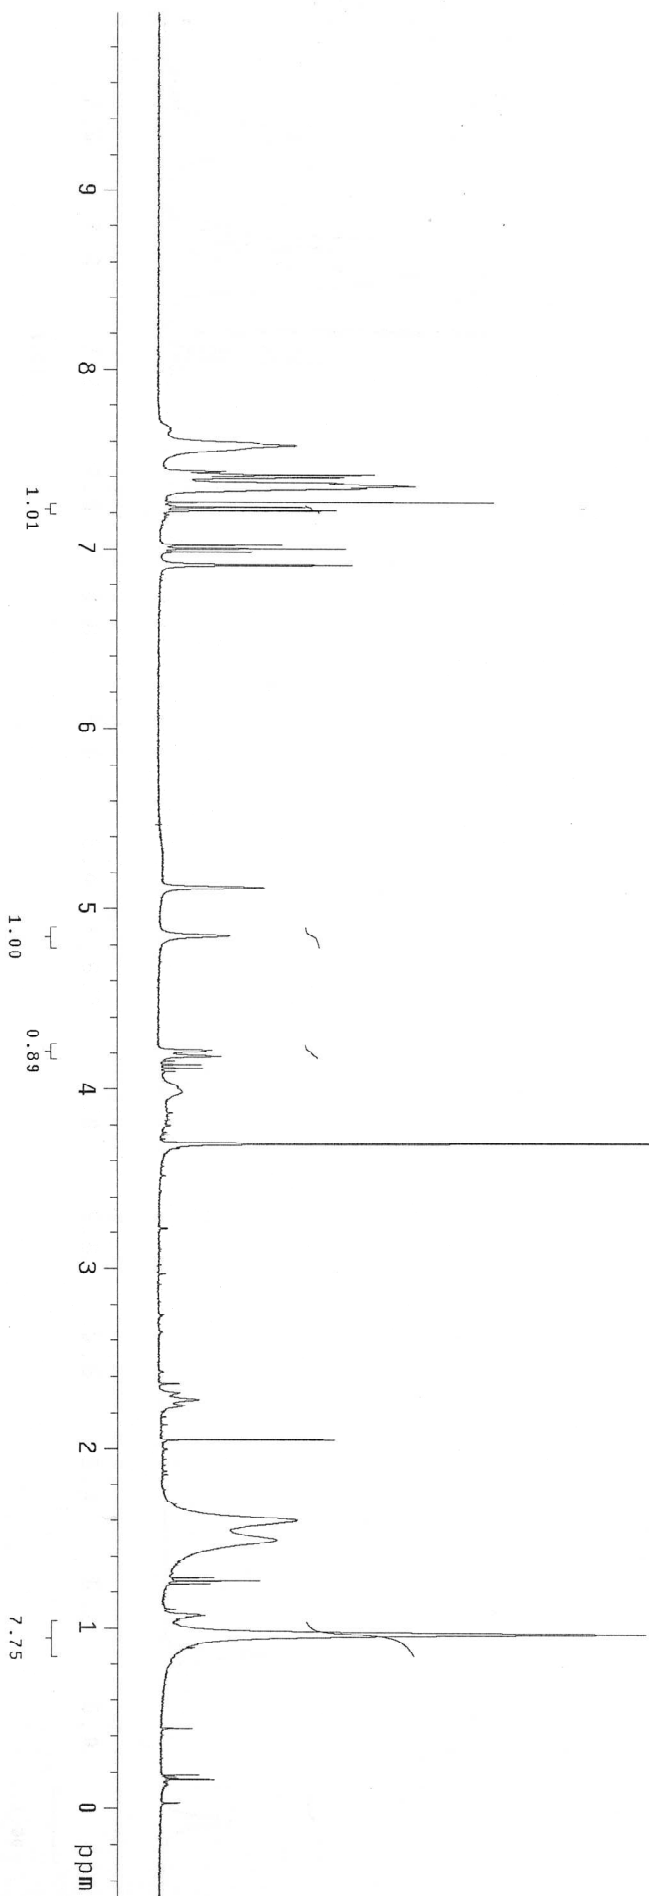

BMG V 170  
exp4 s2pul

SAMPLE  
date JUL 11 2005  
solvent CDC13  
file  
ACQUISITION exp  
sfrq 125.705  
tn C13  
at 1.279  
np 852.62  
sw 33333.3  
fb not used  
bs temp  
tdwr 53  
pv 3.0  
dl 2.000  
tof 2198.1  
nt 5000  
ct 5000  
atlock n  
gain n  
flags n  
il n  
in n  
dp n  
hs y

DEC. & VT 495  
dfrq  
dn  
dpwr  
dof  
dm  
dim  
dimm  
dmt  
dseq  
dres  
dres  
temp  
PROCESSING  
lb  
wtfile  
proc  
fn  
math  
not  
werr  
wexp  
wbs  
wnt

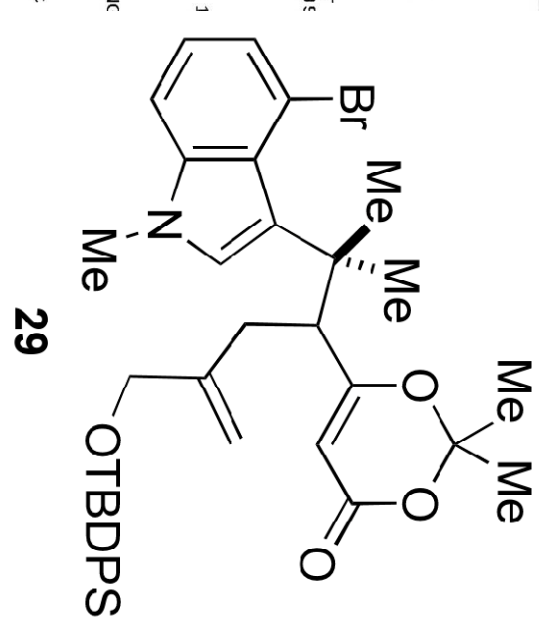

DISPLAY  
sp -628.6  
wp 25766.5  
vs 2711  
sc 0  
wc 250  
h2mm 103.07  
ls 500.00  
rfl 12236.5  
rfp 9678.2  
th 6  
ins 100.000  
al ph

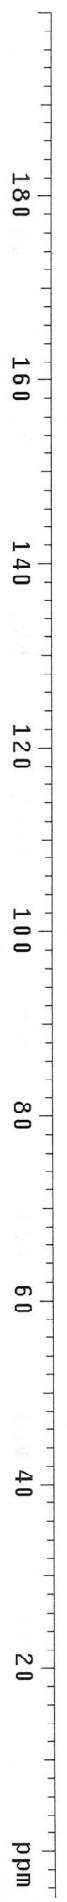

BMGVI-108

Pulse Sequence: szput

Solvent: CDCl3

Ambient temperature

Mercury-400BB "nmr6"

Relax. delay 2.000 sec

Pulse 16.4 degrees

Acq. time 2.856 sec

Width 5602.2 Hz

32 repetitions

OBSERVE H1, 400.2669784 MHz

DATA PROCESSING

Line broadening 0.1 Hz

FT size 32768

Total time 2 min, 40 sec

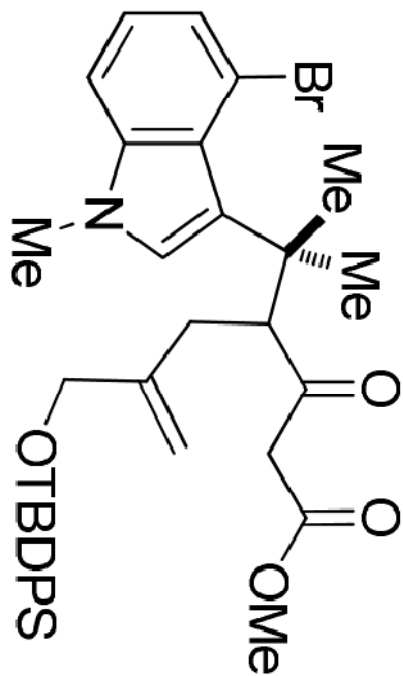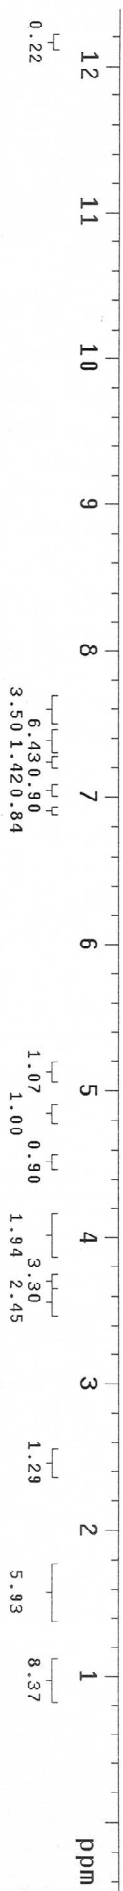

BMGVI-108

Pulse Sequence: s2pu1  
Solvent: CDCl3  
Ambient temperature  
Mercury-400BB "nmr6"

Relax. delay 2.000 sec  
Pulse 22.5 degrees  
Acq. time 1.280 sec  
Width 25188.9 Hz  
1024 repetitions  
OBSERVE C13, 100.6471877 MHz  
DECUPLE H1, 400.2683955 MHz  
Power 38 db  
continuously on  
WALTZ-16 modulated  
DATA PROCESSING  
Line broadening 1.0 Hz  
FT size 65536  
Total time 0 min, 0 sec

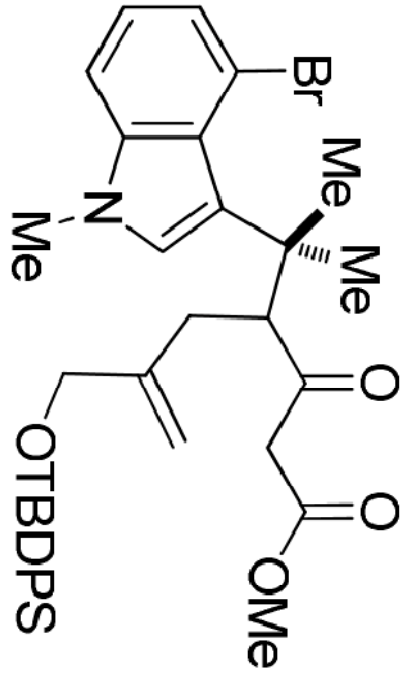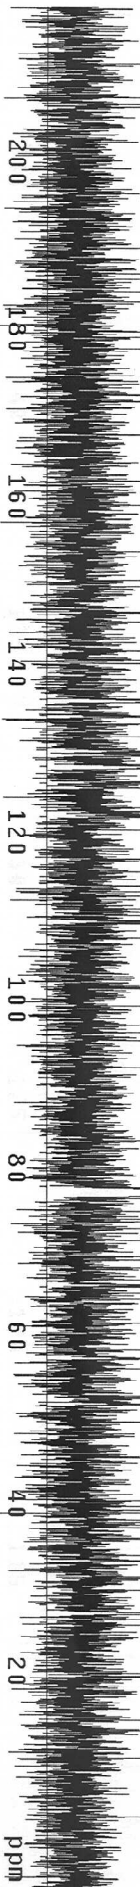

BMGV-198 2nd Column

Pulse Sequence: s2pu1

Solvent: CDCl3

Ambient temperature

Mercury-400BB "nmr8"

Relax. delay 2.000 sec

Pulse 16.4 degrees

Acq. time 2.836 sec

Width 6802.7 Hz

8 repetitions

OBSERVE H1, 400.2569784 MHz

DATA PROCESSING

Line broadening 0.1 Hz

FT size 65536

Total time 0 min, 41 sec

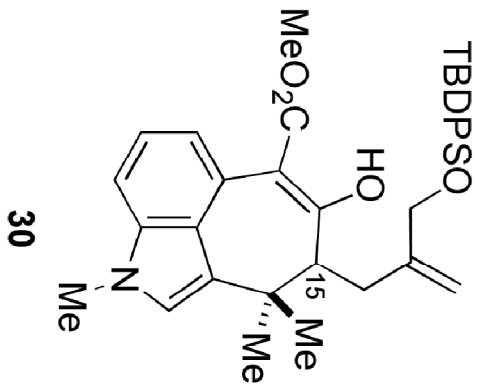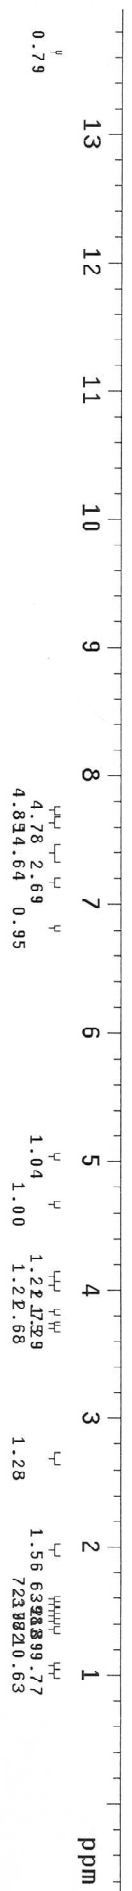

BMGVI-99

Pulse Sequence: s2pu1

Solvent: CDCl3  
Ambient temperature  
Mercury-400BB "nmr-6"

Relax. delay 2.000 sec

Pulse 16.4 degrees

Acq. time 2.856 sec

Width 5602.2 Hz

16 repetitions

OBSERVE H1 400.2669784 MHz

DATA PROCESSING

Line broadening 0.1 Hz

FT size 32768

Total time 0 min, 0 sec

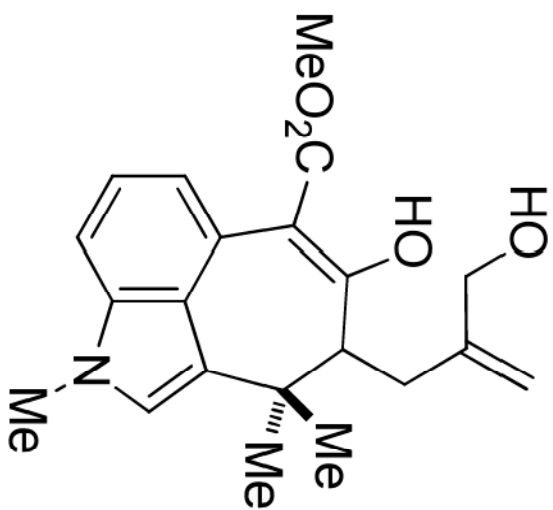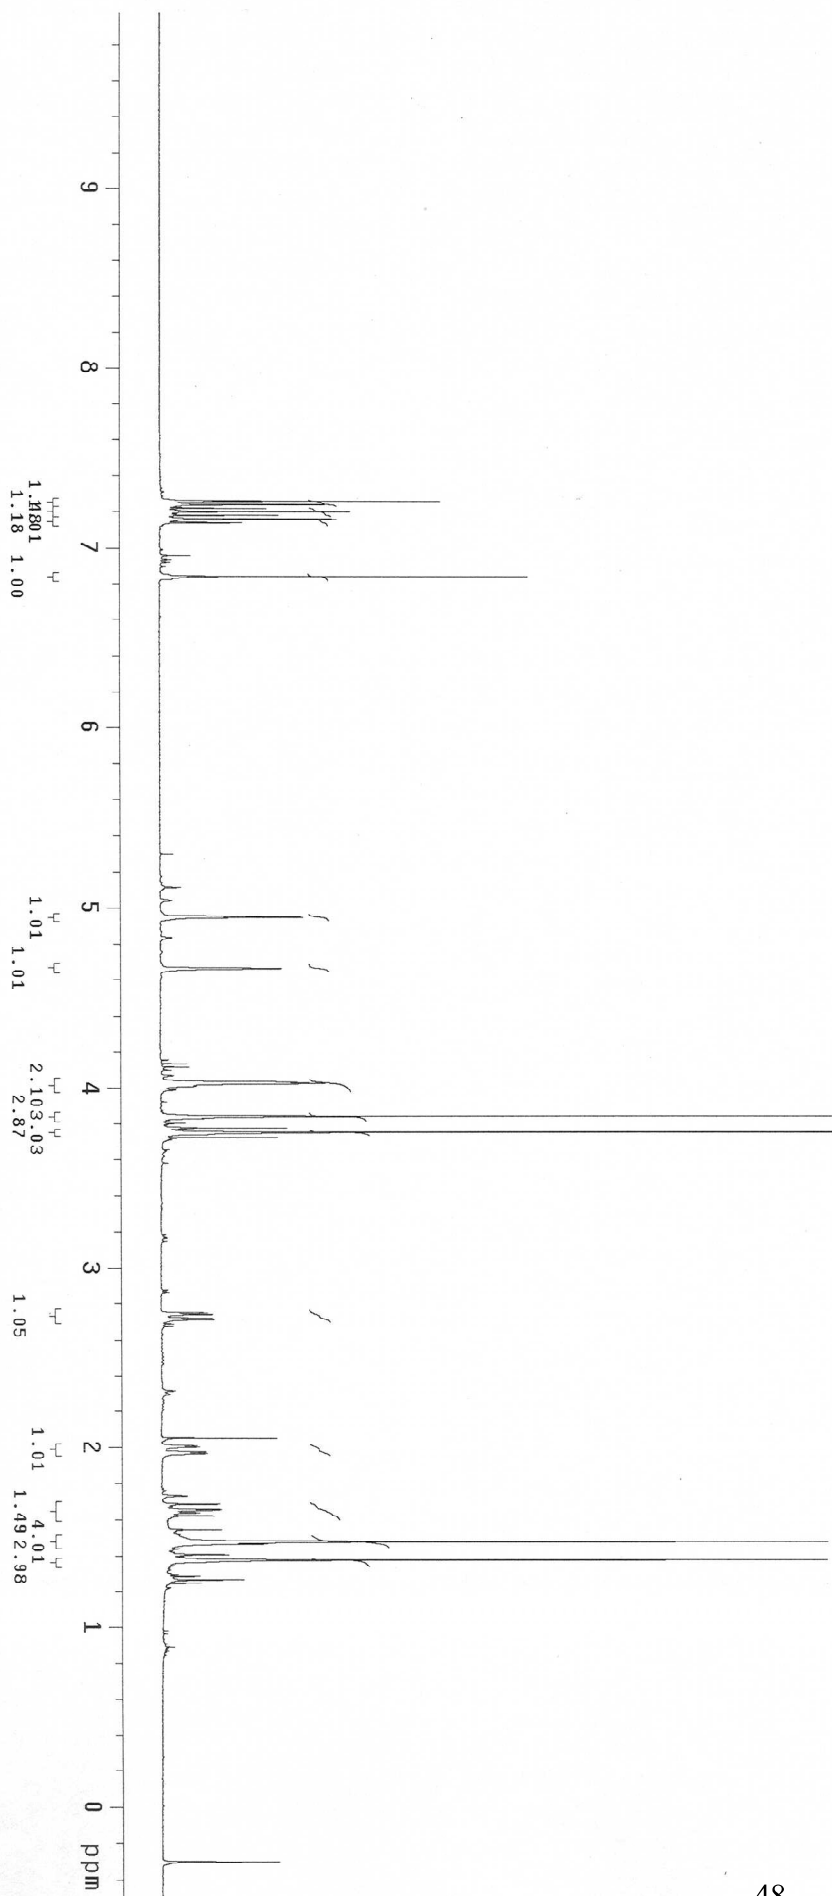



BMGVI-59

Pulse Sequence: s2put  
Solvent: CDCl3  
Ambient temperature  
Mercury-4000B8 "nmr6"

Relax. delay 2.000 sec  
Pulse 22.5 degrees  
Acq. time 1.280 sec  
Width 25188.9 Hz  
1024 repetitions  
OBSERVE C13, 100.6471877 MHz  
DECUPLE H1, 400.2689955 MHz  
Power 38 db  
continuously on  
WALTZ-16 modulated  
DATA PROCESSING  
Line broadening 1.0 Hz  
FT Size 65536  
Total time 0 min, 0 sec

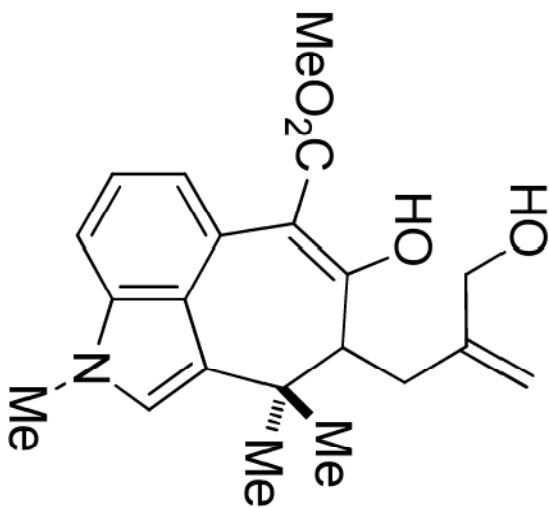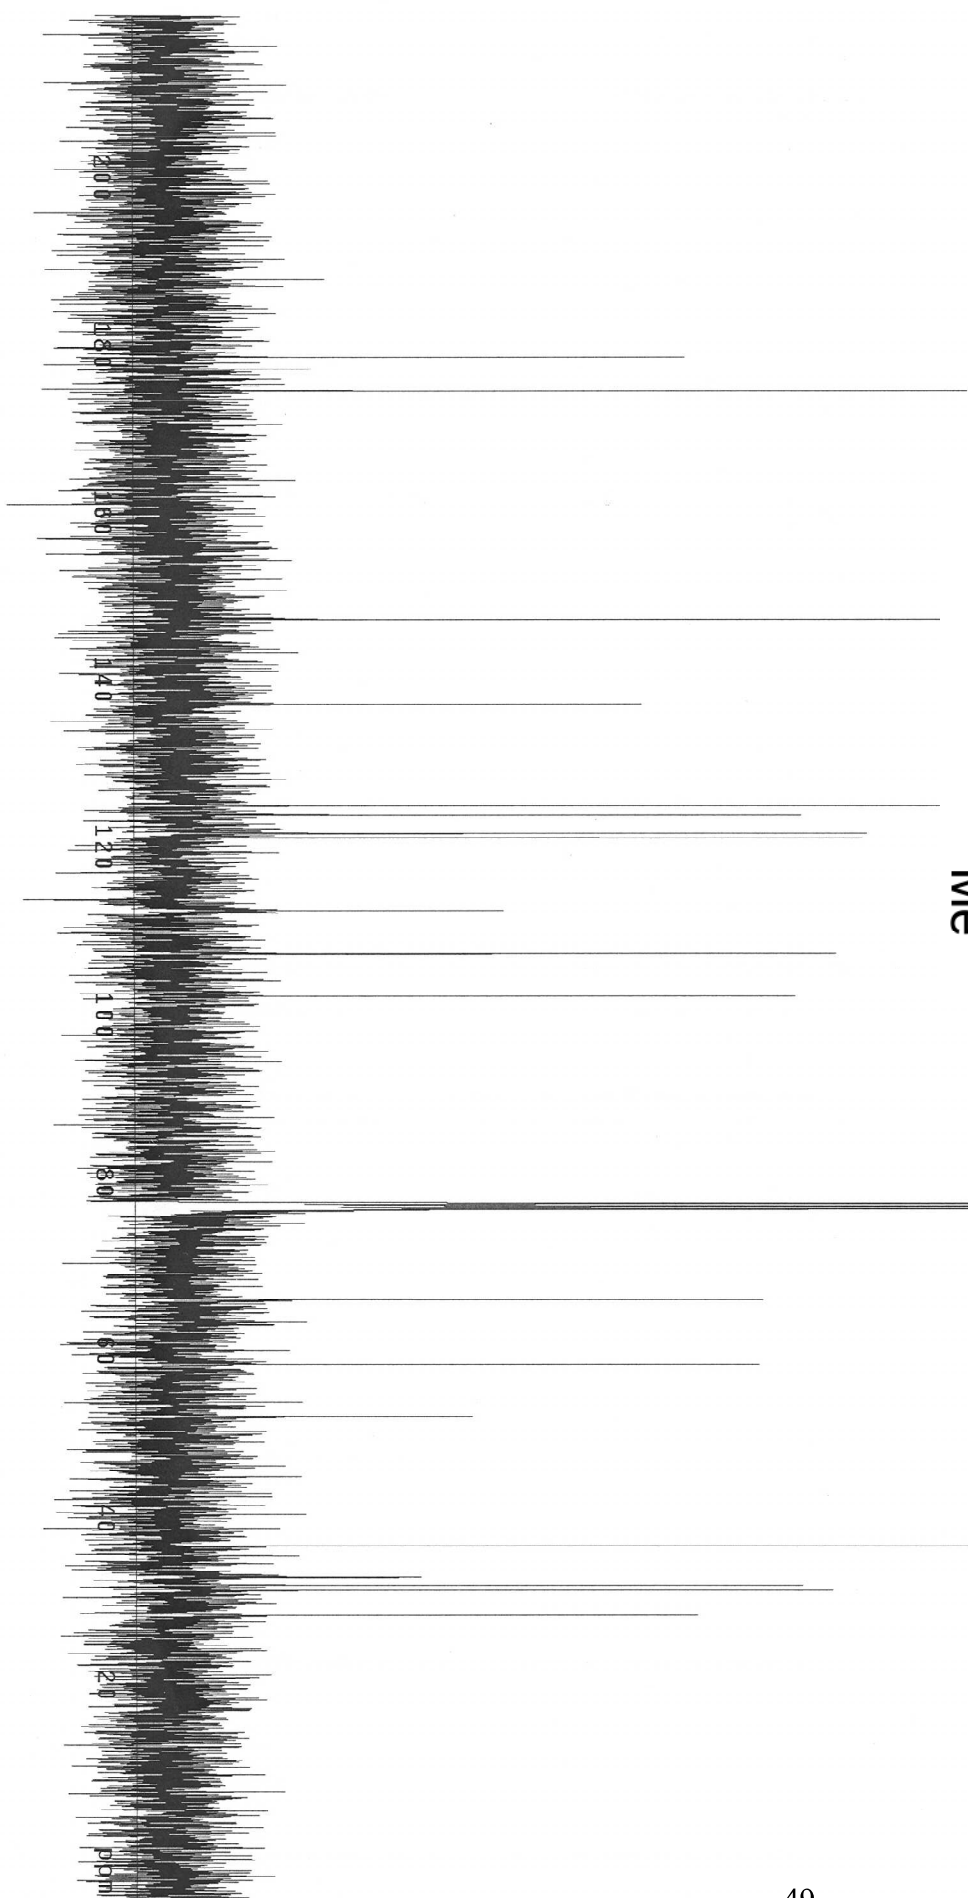

BMG-VI 73  
bmjv173\_h1

expt1 s2pu1

|             |             |            |          |
|-------------|-------------|------------|----------|
| date        | Oct 26 2005 | DEC. & VT  | 499.867  |
| solvent     | CDC13       | d1         | H1       |
| file        | exp         | dpwr       | 30       |
| ACQUISITION | 499.868     | dof        | 0        |
| sfrq        | H1          | dm         | nmn      |
| ln          | H1          | dmt        | C        |
| at          | 3.936       | dseq       | 200      |
| np          | 73980       | dres       | 1.0      |
| sw          | 9256.0      | homo       | n        |
| fb          | not used    | temp       | 27.0     |
| bs          | 32          | PROCESSING | 0.10     |
| tpwr        | 57          | lb         | wfite    |
| pw          | 2.00        | wfite      | f        |
| di          | 2.000       | proc       | not used |
| tof         | 1124.6      | fn         | f        |
| nt          | 64          | math       | f        |
| ct          | 64          | math       | f        |
| alock       | n           | gain       | 30       |
| gain        | 30          | werr       | wexp     |
| fl          | n           | wps        | wnt      |
| in          | n           | wnt        | wft      |
| dp          | y           |            |          |
| hs          | nn          |            |          |

DISPLAY

|      |         |
|------|---------|
| SP   | -250.0  |
| WD   | 5248.5  |
| VS   | 106     |
| SC   | 0       |
| WC   | 0       |
| h2mm | 20.99   |
| IS   | 4467.70 |
| rfl  | 1025.4  |
| rflp | 0       |
| th   | 5       |
| ins  | 1.000   |
| at   |         |

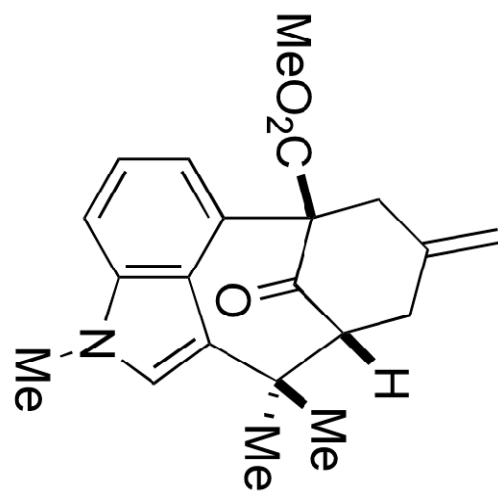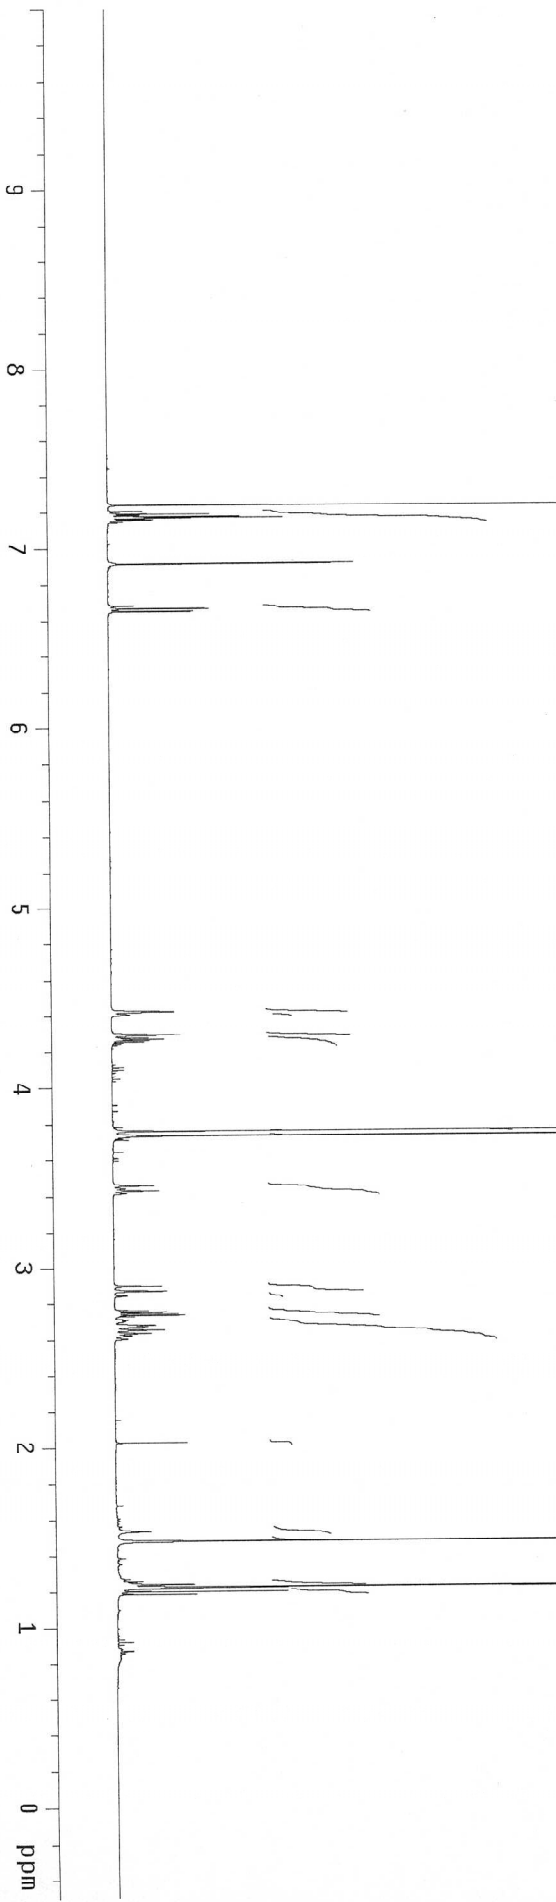

BMG-VI 73  
dmgVI73\_Lc13

exp4 s2pul

SAMPLE DEC. & VI  
 date Oct 26 2005 dfrq 499.867  
 solvent CDCl3 dn H1  
 file exp dpr 37  
 ACQUISITION exp dof 0  
 sfrq 125.705 dm yyy  
 ln C13 dmm W  
 at 1.279 dmt 10582  
 np 85262 dseq  
 sw 33333.3 dres 1.0  
 fb not used homo  
 bs 64 temp 27.0  
 tpwr 53 PROCESSING 1.00  
 pw 3.0 lb  
 dl 2.000 wfile  
 tof 2198.1 proc ft  
 nt 10000 fn not used  
 ct 10000 math f  
 alock n  
 gain 60 werr  
 flags n wexp  
 in n wbs  
 in n wbs  
 dp y wnt  
 hs nn

DISPLAY  
 sp -628.6  
 wp 28280.1  
 vs 3538  
 sc 0  
 wc 250  
 hzmm 113.12  
 ts 500.00  
 rfl 12237.0  
 rfp 9678.2  
 th 5  
 ins 100.000  
 ai cdc ph



32

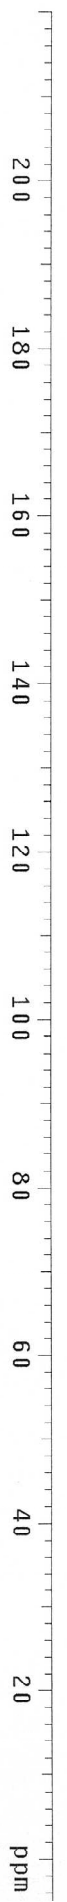

br'ian  
mar'tin  
BMG-VI 83  
bmgyt83\_h1

expt1 s2pu1

SAMPLE DEC. & VT  
date Nov 8 2005 499.857  
solvent CDC13 H1  
file exp  
ACQUISITION 499.858 dm mnm  
sfrq 499.858 H1 dmt C  
tn 3.936 dnt 200  
at 7.3980 dseq  
np 9256.0 dres 1.0  
sw not used homo n  
fb temp 27.0  
bs 32 PROCESSING 0.10  
tdwr 57 1b wffile  
pw 2.0 wffile 0.10  
dl 2.000 proc ft  
tof 1124.6 fn not used f  
nt 64 math  
ct 64 math  
a1ock n  
gain 30  
flags n  
f1 n weff  
in n wexp  
dp n wbs  
hs y wnt wft

DISPLAY nm  
SP -250.0  
WP 5248.5  
VS 179  
SC 0  
WC 250  
h2mm 20.99  
is 5110.11  
f1 1023.4  
f1p 0  
f1h 6  
f1s 6  
ai 1.000  
ph

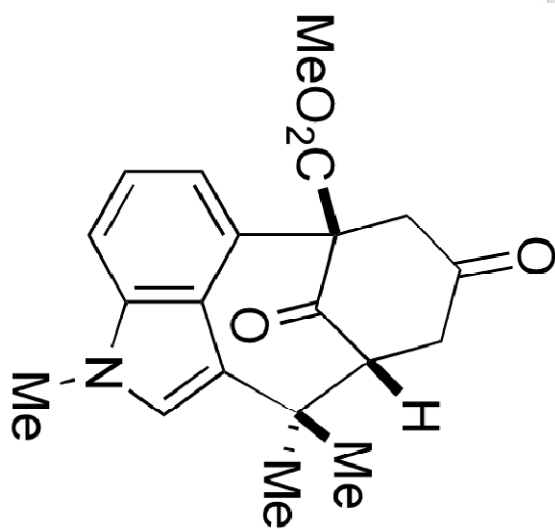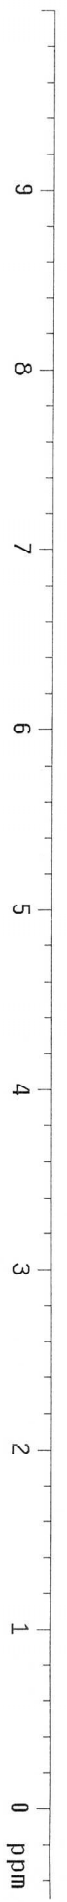

brian  
martin  
BMG-VI 83  
bm9VI83\_CL13

```

exp4 s2pu1
SAMPLE 8 2005 DEC. & VT
date Nov 8 499.867
solvent CDCl3 dn H1
file exp dppwr H1
ACQUISITION 125.705 37
sfrq 125.705 dof 0
tn Cl3 dim YYY
at 1.279 dmf W
np 85262 dseq 10582
sw 33333.3 dres 1.0
fb not used homo n
bs not used temp 27.0
tpwr 53 PROCESSING 1.00
pw 3.0 lb wfile
dl 2.000 wfile
tof 2198.1 fn ft
nt 10000 fn not used
ct 10000 math f
atlock n
gain n 60 weff
flags n 60 weff
i1 n n wexp
in n n wbs
dp n n wnt
hs Y nm
DISPLAY
SP -628.6
WP 28280.1
VS 4548
SC 0
WC 250
hZmm 113.12
IS 500.00
rfl 12236.0
rfp 9678.2
th 6
ins 100.000
aj cdc ph

```

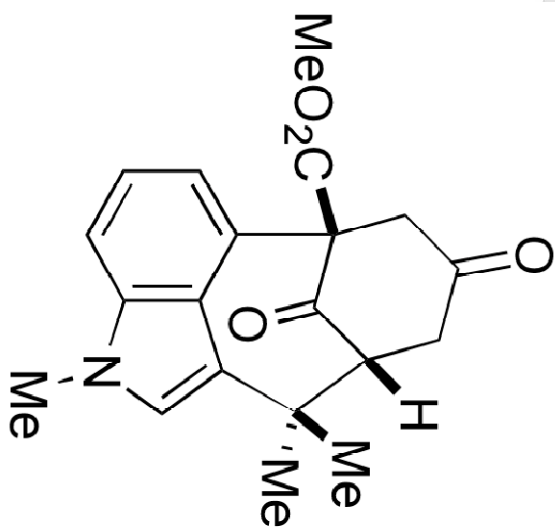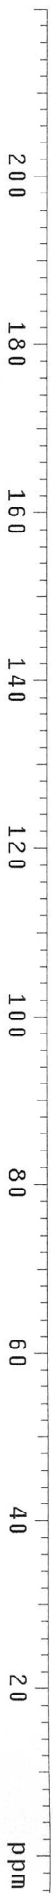

Supplement: NIHMS203008-supplement-1_si_001.pdf [file NIHMS203008-supplement-1_si_001.pdf]
